# Supplementary material for: Double-gradient-structured composite aerogels for ultra-high-performance moisture energy harvesting
Source: Royal Society of Chemistry journal article supplement (doi:10.1039/d3ee00981e), 2023-01-01
Supplement: d3ee00981e1.pdf [file d3ee00981e1.pdf]

### **Supporting information**

Xuezhong Zhang<sup>1</sup>, Zijian Dai<sup>1</sup>, Jie Chen<sup>1</sup>, Xin Chen<sup>1</sup>, Xiong Lin<sup>1</sup>, Shuang Yang<sup>1</sup>, Kai Wu<sup>1</sup>,  
Qiang Fu<sup>1\*</sup>, Hua Deng<sup>1\*</sup>

<sup>1</sup>College of Polymer Science and Engineering, State Key Laboratory of Polymer Materials  
Engineering, Sichuan University, Chengdu 610065, PR China

Corresponding authors: huadeng@scu.edu.cn (H. Deng), qiangfu@scu.edu.cn (Q. Fu)

## Table of Contents

|                                                       |           |
|-------------------------------------------------------|-----------|
| <b>1. Experimental Section.....</b>                   | <b>4</b>  |
| 1.1. Materials.....                                   | 4         |
| 1.2. Synthesis of CSWNT and NSWNT .....               | 4         |
| 1.3. Preparation of polymer dendritic colloids.....   | 5         |
| 1.4. Preparation of aerogels.....                     | 5         |
| 1.4.1. Preparation of SWNT/PVA/CNF aerogels.....      | 5         |
| 1.4.2. Preparation of SWNT@PVA/CNF aerogels .....     | 6         |
| 1.4.3. Preparation of NSC@PVA/CNF aerogels.....       | 6         |
| 1.4.4. Preparation of SWNT@CCP aerogels.....          | 6         |
| 1.4.5. Preparation of NSC@CCP aerogels .....          | 7         |
| 1.5. Preparation of MEGs.....                         | 8         |
| <b>2. Preparation of CSWNT and NSWNT .....</b>        | <b>9</b>  |
| 2.1. TEM .....                                        | 9         |
| 2.2. XPS .....                                        | 9         |
| 2.3. XRD .....                                        | 11        |
| 2.4. Zeta potential.....                              | 12        |
| 2.5. Conductivity.....                                | 13        |
| <b>3. Characterization of dendritic colloids.....</b> | <b>13</b> |
| 3.1. Polarizing microscope.....                       | 13        |
| 3.2. FESEM.....                                       | 14        |
| 3.3. Zeta potential.....                              | 16        |
| 3.4. Rheology behaviour .....                         | 17        |
| <b>4. Characterization of aerogel.....</b>            | <b>18</b> |
| 4.1. BET .....                                        | 18        |
| 4.2. Conductivity.....                                | 19        |
| 4.3. FESEM.....                                       | 20        |
| 4.4. Density and pore size .....                      | 20        |
| 4.5. Moisture-induced electricity performance .....   | 21        |

|           |                                                    |           |
|-----------|----------------------------------------------------|-----------|
| 4.5.1.    | Content dependence.....                            | 21        |
| 4.5.2.    | Thickness dependence .....                         | 24        |
| 4.5.3.    | Area dependence .....                              | 25        |
| 4.5.4.    | Density dependence.....                            | 26        |
| 4.5.5.    | Comparison of literatures .....                    | 29        |
| 4.5.6.    | Cycling stability.....                             | 30        |
| 4.5.7.    | Electrode dependence .....                         | 30        |
| 4.5.8.    | Density Functional Theory (DFT) calculations ..... | 33        |
| 4.5.9.    | KPFM .....                                         | 37        |
| 4.5.10.   | Ion density gradient dependence .....              | 39        |
| 4.5.11.   | Hydrophilicity gradient dependence.....            | 40        |
| 4.5.12.   | Energy conversion efficiency. ....                 | 42        |
| <b>5.</b> | <b>Application.....</b>                            | <b>43</b> |
| <b>6.</b> | <b>Supporting References.....</b>                  | <b>43</b> |

## **1. Experimental Section**

### **1.1. Materials**

CS, CNF and PVA are provided by Aladdin Reagent (Shanghai) Co., Ltd. Hydrochloric acid (HCl, 37%), potassium hydroxide (KOH), hydrochloric acid (HCl, 37%), tert-butanol (TBA) and glutaraldehyde (50% aqueous solution) are supplied by Chengdu Kelong Chemical Reagent Company (China). SWNT is purchased from Deyang Carbonene Technology Co., Ltd (China). 1-carboxyethyl-3-methylimidazolium nitrate (COOH-IL) and 1-(3-aminopropyl)-3-methylimidazolium bromide (IL-NH<sub>2</sub>) are purchased from Lanzhou Institute of Chemical Physics.

### **1.2. Synthesis of CSWNT and NSWNT**

Firstly, 500 mL deionized water, 250 mg COOH-IL, 250 mg SWNT and 250 mg KOH were added to a 1000 mL flask and sonicated at 300 W for 30 min. Subsequently, the suspension was stirred at 90 °C for 24 h. The carboxylated single-walled carbon nanotubes (CSWNT) were obtained by washing and centrifuging the reacted suspension. Similarly, amino-functionalized single-walled carbon nanotubes (NSWNT) were also prepared using the method mentioned above.

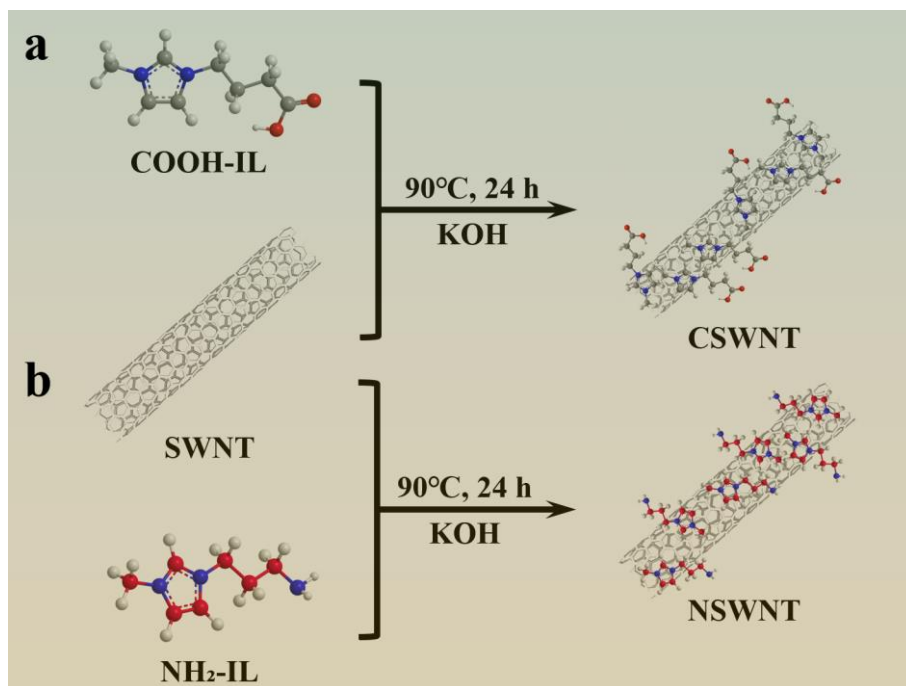

**Fig. S1** The schematic diagram of a CSWNT and b NSWNT preparation

### 1.3. Preparation of polymer dendritic colloids

PVA dendritic colloids were obtained by slowly adding 20 g 10 wt% PVA water solution into the turbulent flow of 80 g TBA, which was formed by high-speed shearing of TBA in the IKA Magic Lab device (IKA Works Inc.) operating at 20000 rpm. CNF dendritic colloids were obtained by slowly adding 40 g 4.5 wt% CNF water solution into the turbulent flow of 50 g TBA. CS dendritic colloids were obtained by slowly adding 40 g 5 wt% CNF water solution into the turbulent flow of 60 g TBA.

### 1.4. Preparation of aerogels

#### 1.4.1. Preparation of SWNT/PVA/CNF aerogels

From Fig. S2a, 1.5 g PVA particles, 50 g 1 wt% CNF solution and 48.5 mL deionized water were added to a 250 mL single-necked bottle, and the PVA/CNF solution with a mass fraction of 2 wt % was obtained by heating and stirring at 60°C. Subsequently, ultrasonication disperses SWNT in 2 wt% PVA/CNF water solution (300W, 10 min). Next, glutaraldehyde (80μL, 50 wt%

in DI water) and hydrochloric acid (800mL, 3 wt%) were loaded into SWNT/PVA/CNF solution (10 mL, 25mg/mL) and transferred to liquid nitrogen for freezing. Finally, after the GO/PVA was solidified, it was lyophilized in a freeze-dryer ( $-50^{\circ}\text{C}$ , 10Pa).

#### **1.4.2. Preparation of SWNT@PVA/CNF aerogels**

From Fig. S2b, PVA/CNF dendritic colloids were obtained by mixing 30 g 2wt % PVA dendritic colloid and 10 g 2wt % CNF dendritic colloid. Subsequently, ultrasonication disperses SWNT in 2 wt% PVA/CNF dendritic colloids (300W, 10 min). Next, glutaraldehyde (80  $\mu\text{L}$ , 50 wt% in DI water) and hydrochloric acid (800mL, 3 wt%) were loaded into SWNT/PVA/CNF dendritic colloids (10 mL, 25mg/mL) and transferred to liquid nitrogen for freezing. Finally, after the GO/PVA was solidified, it was lyophilized in a freeze-dryer ( $-50^{\circ}\text{C}$ , 10Pa).

#### **1.4.3. Preparation of NSC@PVA/CNF aerogels**

From Fig. S2c, PVA/CNF dendritic colloids were obtained by mixing 30 g 2wt % PVA dendritic colloid and 10 g 2wt % CNF dendritic colloid. Subsequently, CSWNT, SWNT and NSWNT were ultrasonically dispersed into PVA/CNF, dendritic colloids to obtain CSWNT@PVA/CNF, SWNT@PVA/CNF and NSWNT@PVA/CNF dendritic colloids (300W, 10 min). Next, glutaraldehyde (80 $\mu\text{L}$ , 50 wt% in DI water) and hydrochloric acid (800mL, 3 wt%) were loaded to CSWNT@PVA/CNF, SWNT@CS/CNF and NSWNT@CS dendritic colloids and transferred to  $-20^{\circ}\text{C}$  freezers and kept for 24h. Finally, after the dendritic colloids were solidified, they were lyophilized in a freeze-dryer ( $-50^{\circ}\text{C}$ , 10Pa).

#### **1.4.4. Preparation of SWNT@CCP aerogels**

From Fig. S2d, CS/CNF dendritic colloids were obtained by mixing 30 g 2wt % CS dendritic colloid and 10 g 2wt % CNF dendritic colloid. Subsequently, SWNT were ultrasonically dispersed into PVA/CNF, CS/CNF and CS dendritic colloids to obtain SWNT@PVA/CNF, SWNT@CS/CNF and SWNT@CS dendritic colloids (300W, 10 min).

Next, glutaraldehyde (80 $\mu$ L, 50 wt% in DI water) and hydrochloric acid (800mL, 3 wt%) were loaded to CSWNT@PVA/CNF, SWNT@CS/CNF and NSWNT@CS dendritic colloids and transferred to -20°C freezers and kept for 24h. Finally, after the dendritic colloids were solidified, they were lyophilized in a freeze-dryer (-50°C, 10Pa).

#### **1.4.5. Preparation of NSC@CCP aerogels**

From Fig. S2e, CS/CNF dendritic colloids were obtained by mixing 30 g 2wt % CS dendritic colloid and 10 g 2wt % CNF dendritic colloid. Subsequently, CSWNT, SWNT and NSWNT were ultrasonically dispersed into PVA/CNF, CS/CNF and CS dendritic colloids to obtain CSWNT@PVA/CNF, SWNT@CS/CNF and NSWNT@CS dendritic colloids (300W, 10 min). Next, glutaraldehyde (80 $\mu$ L, 50 wt% in DI water) and hydrochloric acid (800mL, 3 wt%) were loaded to CSWNT@PVA/CNF, SWNT@CS/CNF and NSWNT@CS dendritic colloids and transferred to -20°C freezers and kept for 24h. Finally, after the dendritic colloids were solidified, they were lyophilized in a freeze-dryer (-50°C, 10Pa).

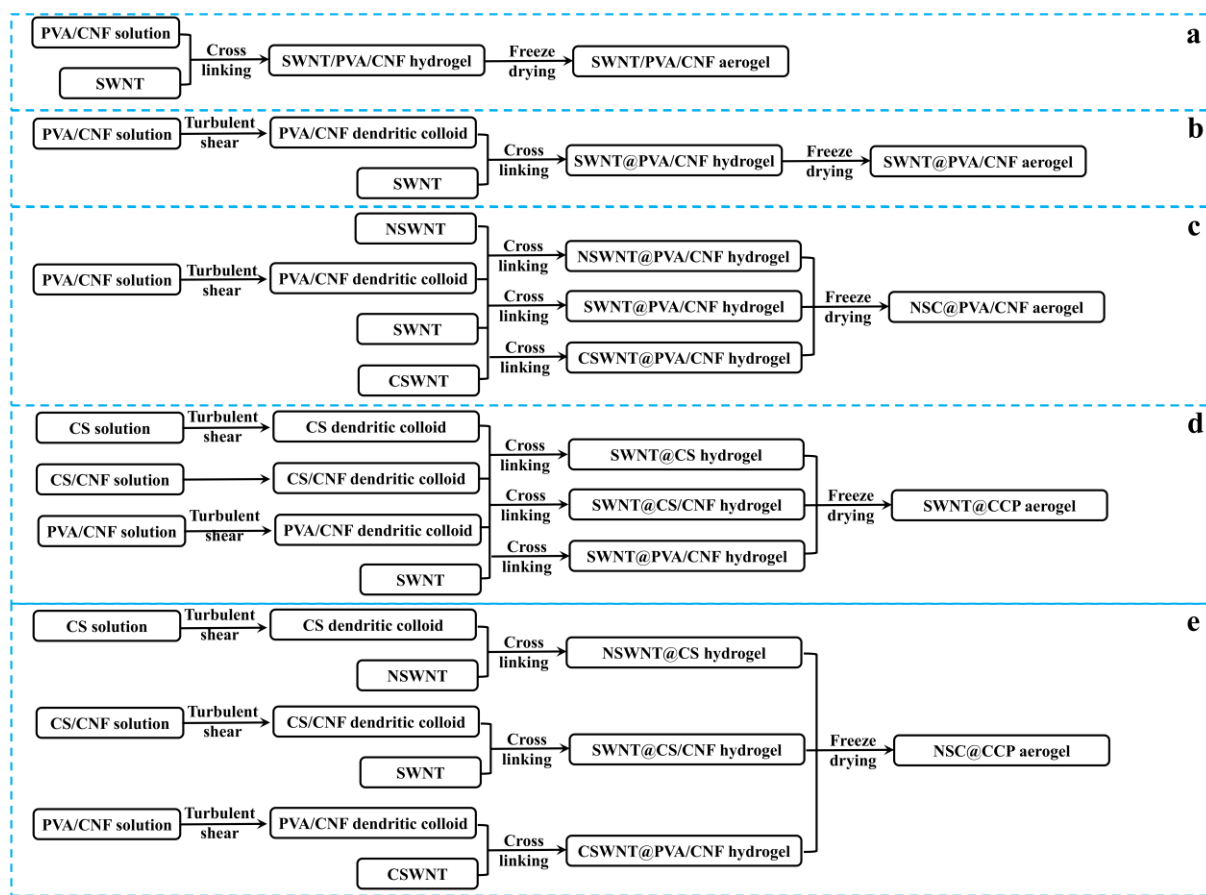

Fig. S2 Preparation diagram of composite aerogels

### 1.5. Preparation of MEGs

A conductive silver paste was applied to both ends of the aerogel to connect the electrode and the porous metal foam (Ni, Ag, and Pt), as is shown in Fig. S3.

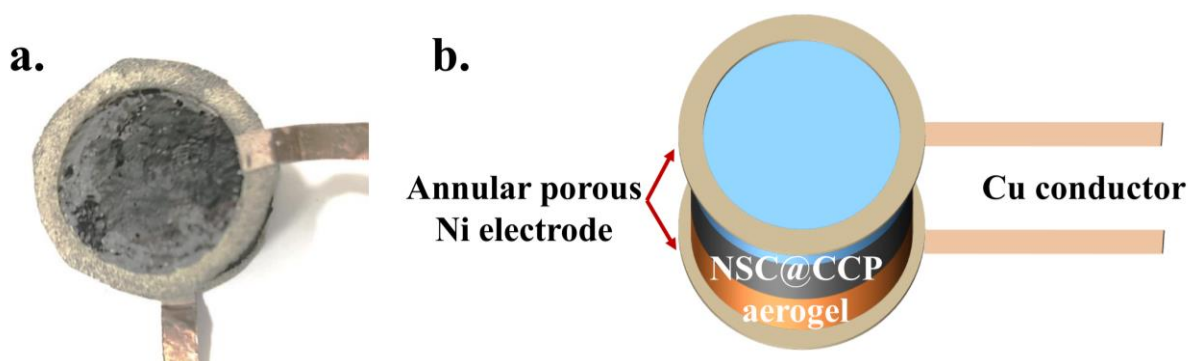

Fig. S3 a. Photograph of MEGs, b. Schematic diagram of MEGs.



## 2. Preparation of CSWNT and NSWNT

### 2.1. TEM

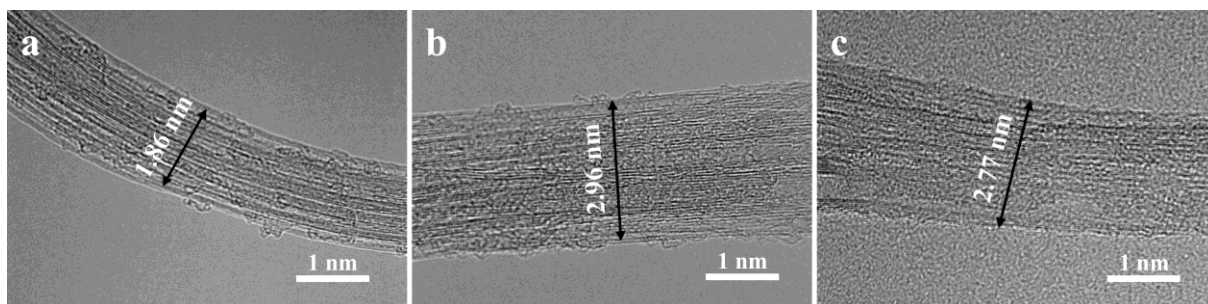

Fig. S4 (a-c) TEM of SWNT, CSWNT and NSWNT

### 2.2. XPS

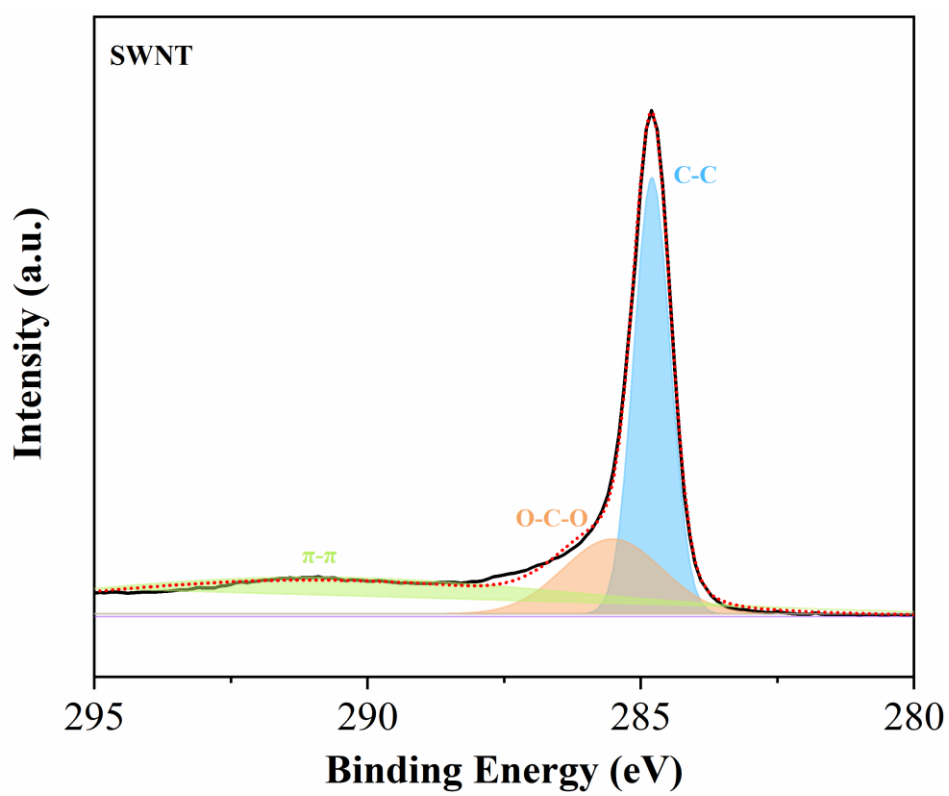

Fig. S5 C1s of SWNT

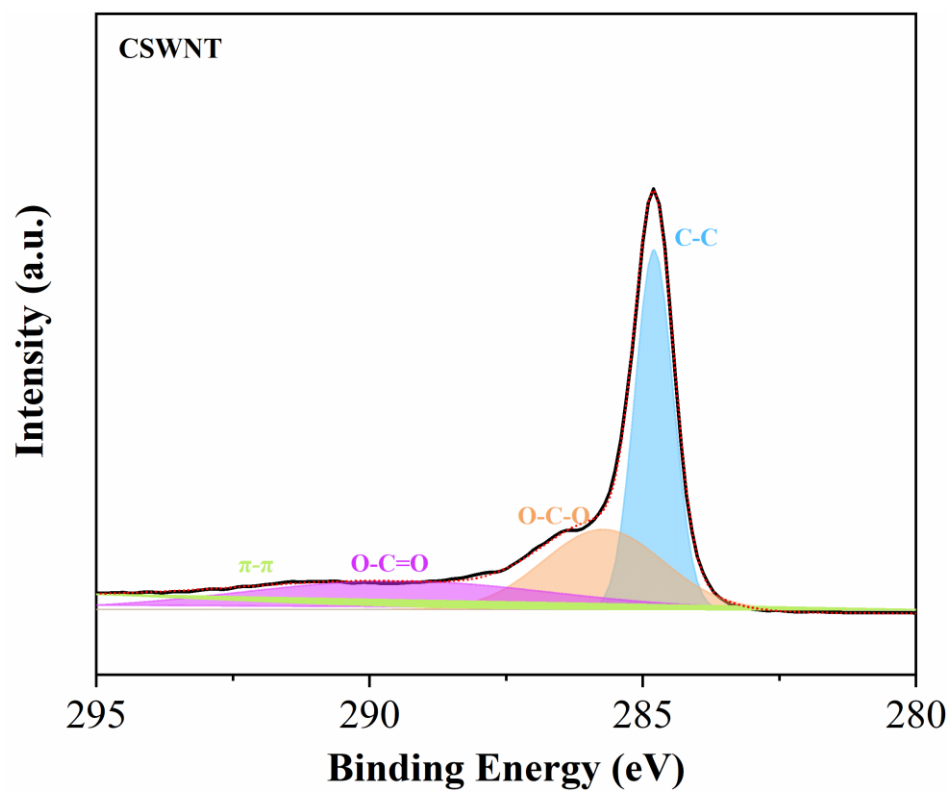

Fig. S6 C1s of CSWNT

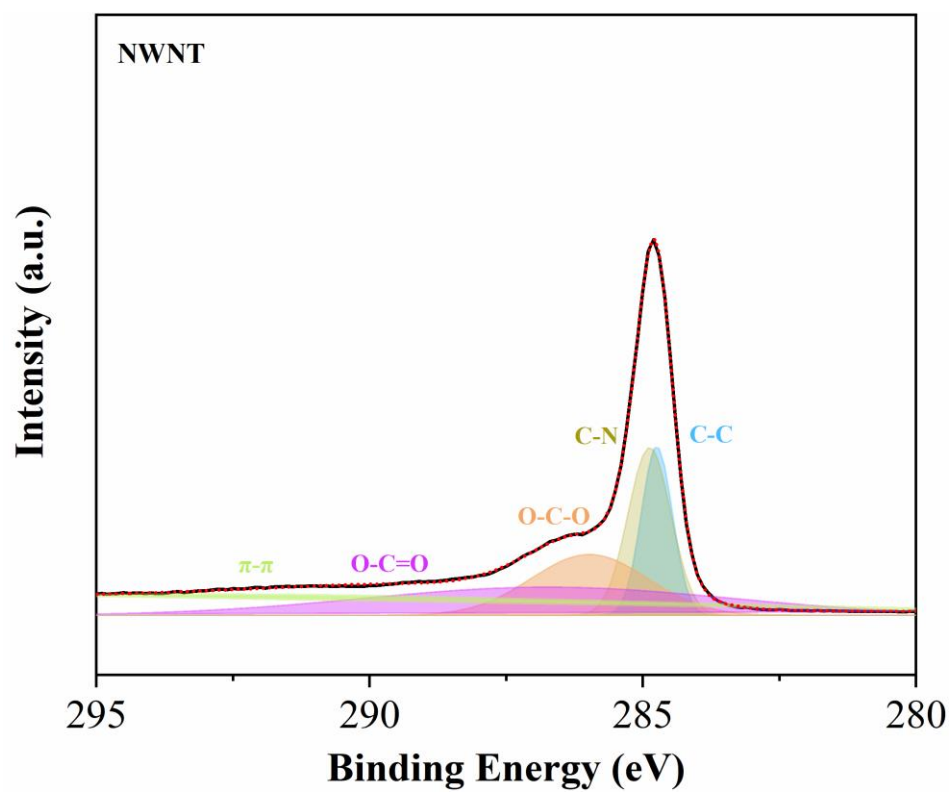

Fig. S7 C1s of NSWNT

Table S1. The mass fractions of C, N and O elements in SWNT before and after modification.

| Samples | C (wt. %) | N (wt. %) | O (wt. %) |
|---------|-----------|-----------|-----------|
| SWNT    | 92.72     | 0.76      | 6.52      |
| CSWNT   | 70.61     | 5.14      | 24.25     |
| NSWNT   | 65.86     | 11.82     | 22.32     |

### 2.3. XRD

For the original SWNT, a sharp diffraction peak of (002) crystal plane appears at  $2\theta = 26.4^\circ$ . According to the Bragg equation, the interplanar spacing (d) of SWNT can be calculated.

$$2d \sin\theta = n\lambda$$

Among them, d is the interplanar spacing,  $\theta$  is the angle between the incident X-ray and the corresponding crystal plane,  $\lambda$  is the wavelength of the X-ray, and n is the diffraction series. After calculation, the interplanar spacing d of SWNT is 3.363 Å, which is still far from the d value (3.354 Å) of graphite single crystal, which means that the graphene layer in SWNT is a disordered layer structure.

Due to the grafting of ionic liquids, the crystallization peak appears to shift to the left, the intensity decreases and the width increases. Among them, CSWNT and NSWNT have wide (002) crystal plane diffraction peaks at  $2\theta$  of  $25.4^\circ$  and  $25.7^\circ$ , respectively. The crystal plane spacing d of CSWNT and NSWNT is 3.494 and 3.454 Å, respectively, and the spacing of the graphite layer in SWNT is improved.

Table S2. Interplanar spacing of SWNT, CSWNT and NSWNT

| Samples | $2\theta$ (°) | d (Å) |
|---------|---------------|-------|
| SWNT    | 26.4          | 3.363 |
| CSWNT   | 25.4          | 3.494 |
| NSWNT   | 25.7          | 3.454 |

## 2.4. Zeta potential

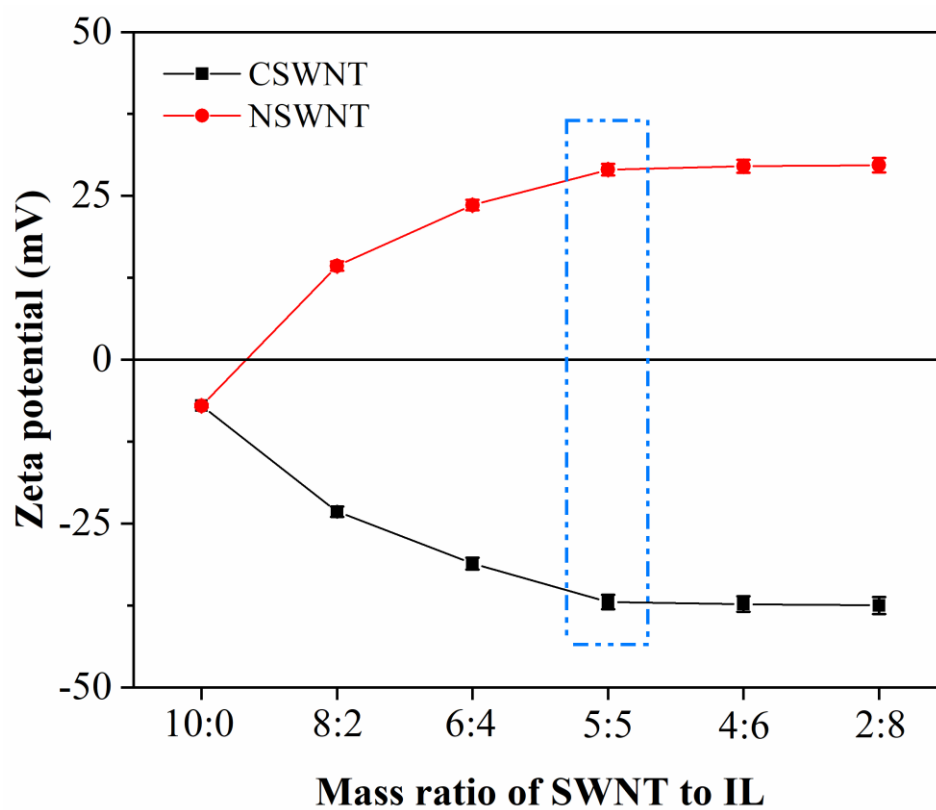

Fig. S8 Zeta potential of fillers under different mass ratios of SWNT and IL

## 2.5. Conductivity

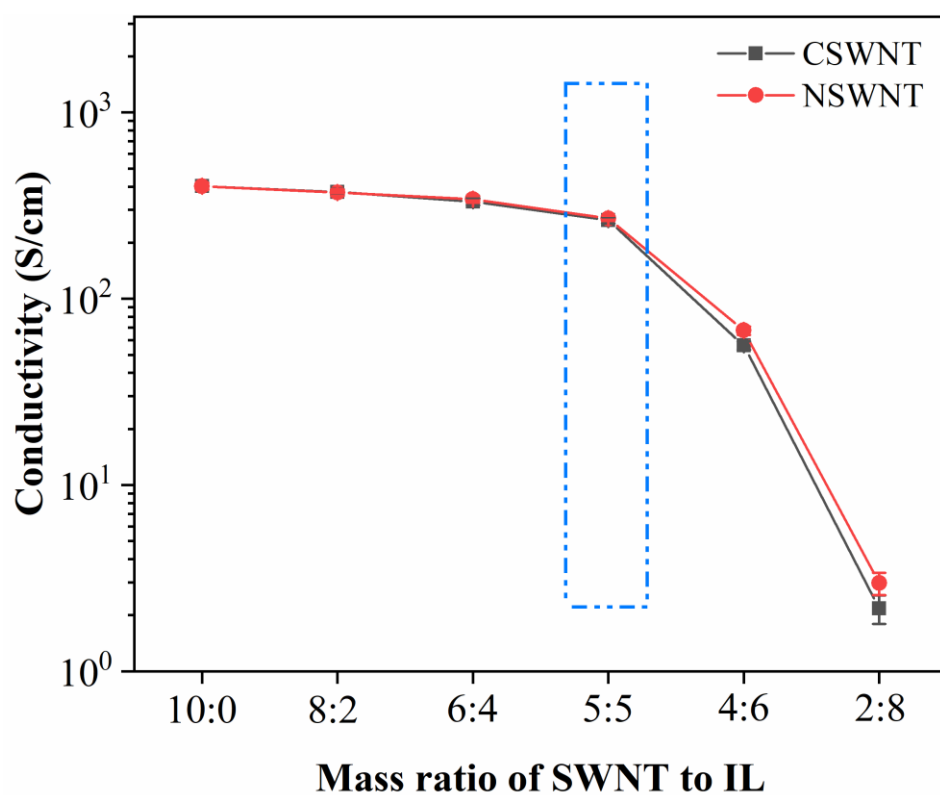

**Fig. S9** The conductivity of fillers under different mass ratios of SWNT and IL

## 3. Characterization of dendritic colloids

### 3.1. Polarizing microscope

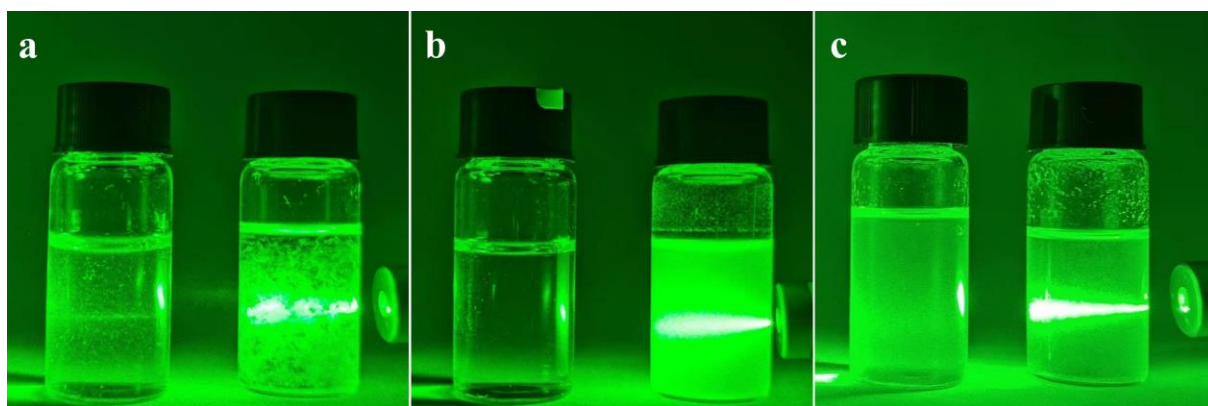

**Fig. S10** Photos of the 'Tyndall' effect of polymer dendritic colloids: (a) PVA, (b) CNF and (c) CS

### 3.2. FESEM

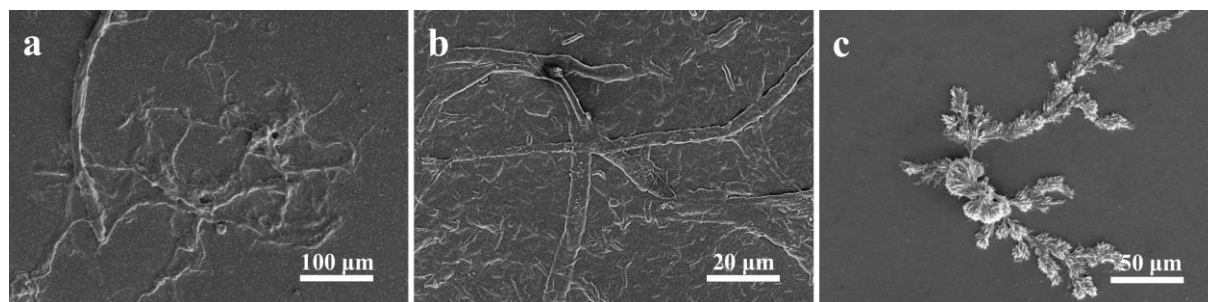

**Fig. S11** FESEM of polymer dendritic colloids: (a) PVA, (b) CNF, (c) CS

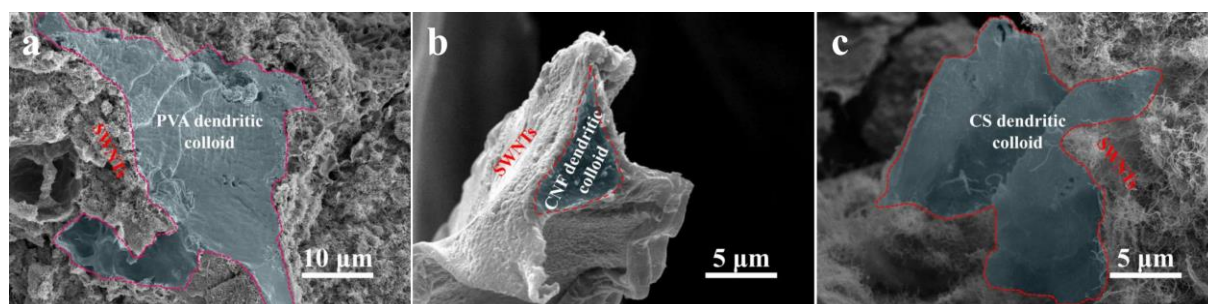

**Fig. S12** FESEM of filler@polymer dendritic colloid: (a) SWNT@PVA, (b) SWNT@CNF and (c) SWNT@CS

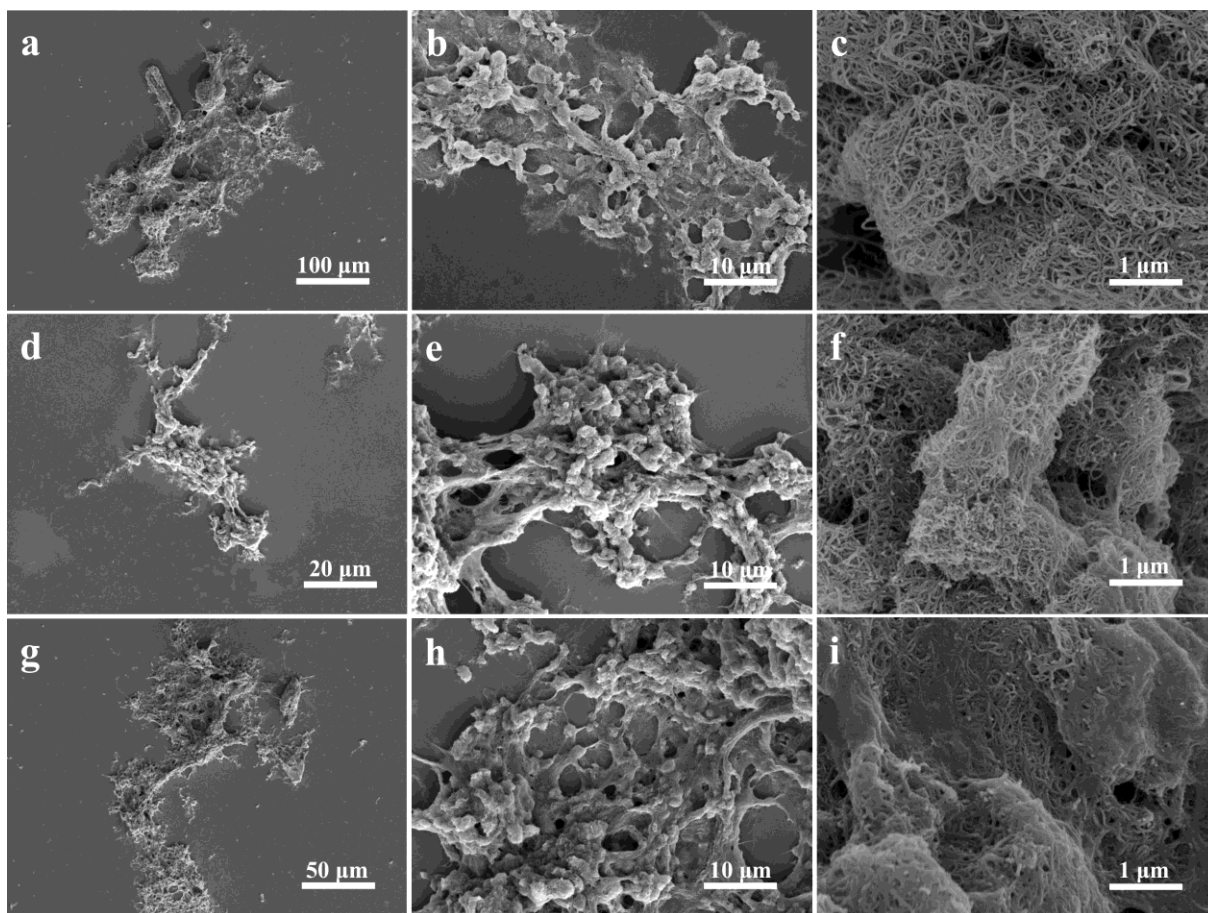

**Fig. S13** FESEM of filler@polymer dendritic colloid: (a-c) CSWNT@PVA/CNF, (d-f) SWNT@CS/CNF and (g-i) NSWNT@CS

### 3.3. Zeta potential

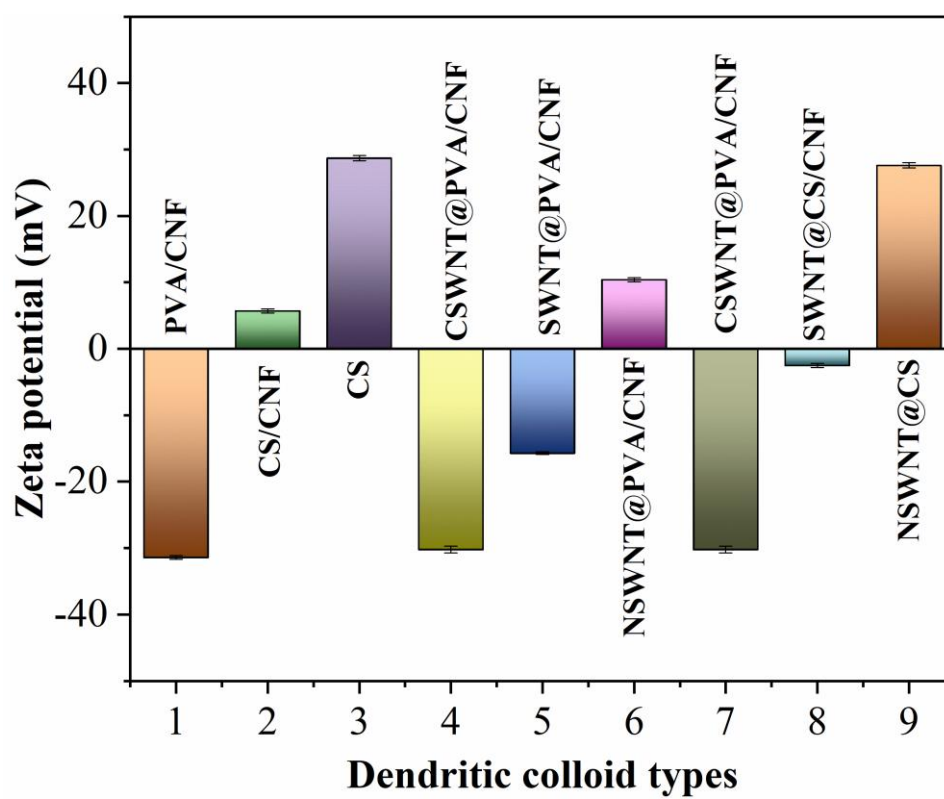

Fig. S14 Zeta potential of filler@polymer dendritic colloid



### 3.4. Rheology behaviour

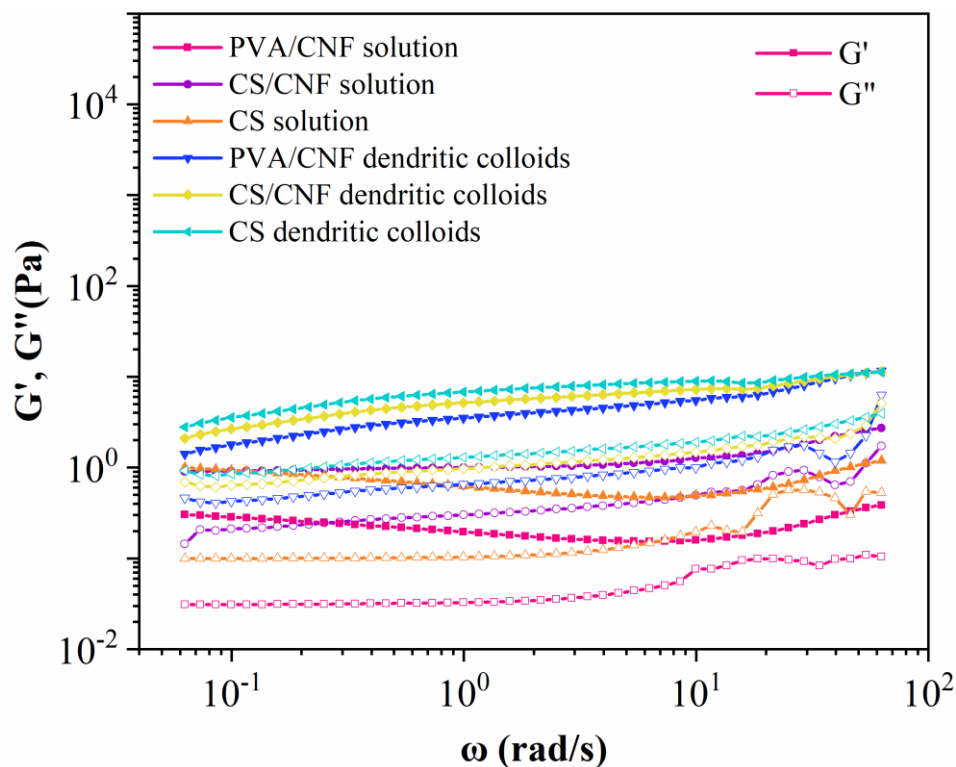

Fig. S15 Rheological behavior of polymer solution and dendritic colloid

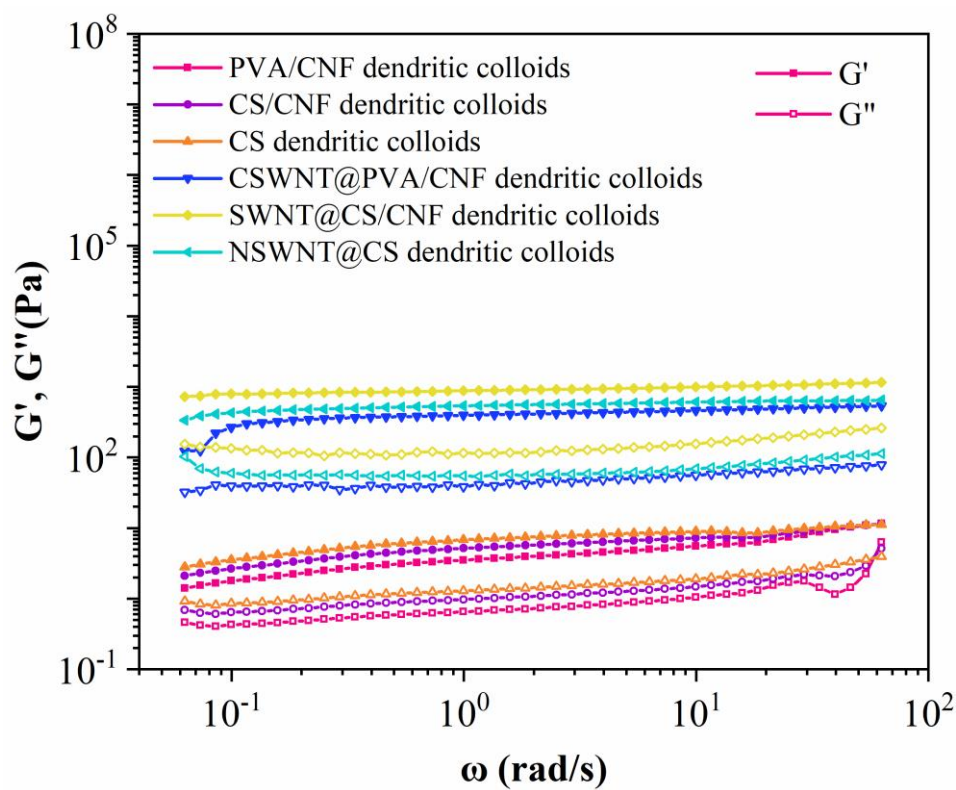

**Fig. S16** Rheological behavior of Filler@dendritic colloid

## 4. Characterization of aerogel

### 4.1. BET

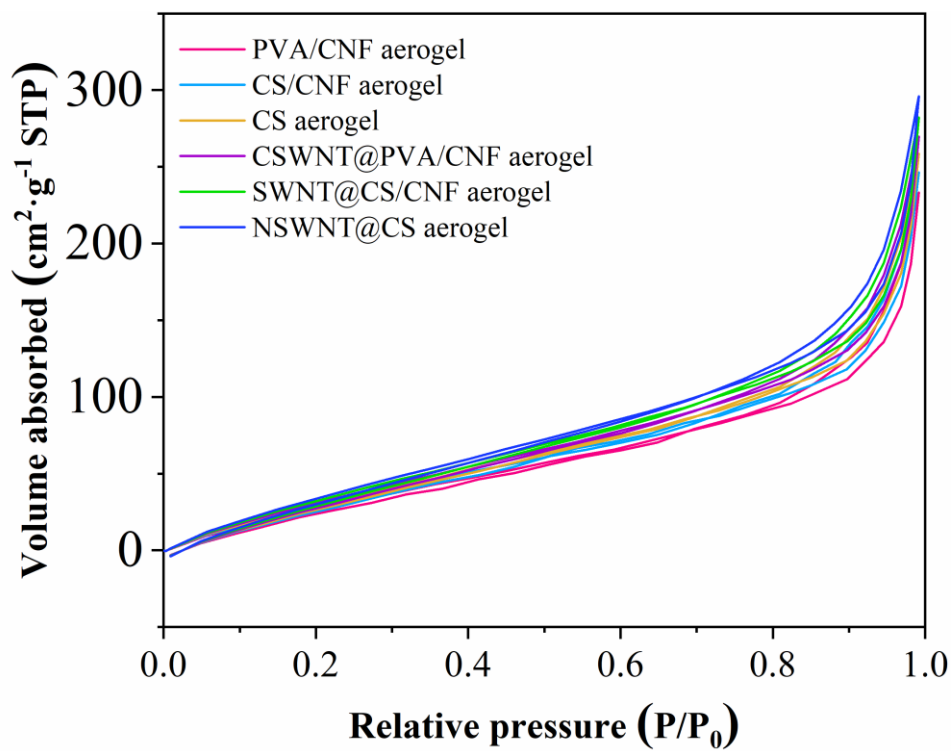

**Fig. S17** The specific surface area of aerogel

## 4.2. Conductivity

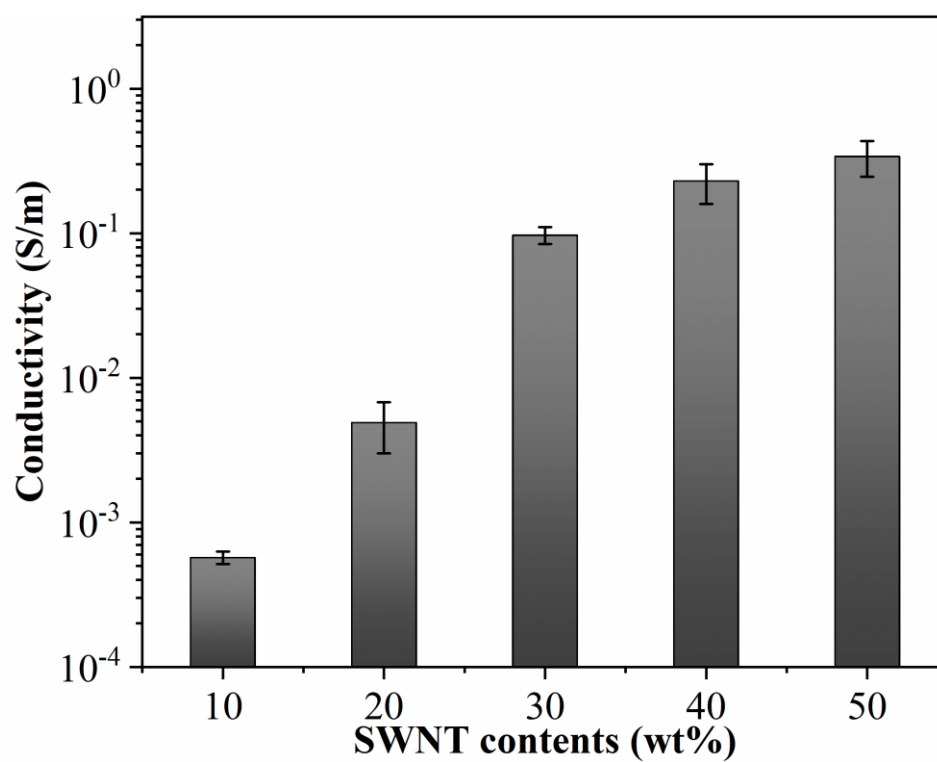

**Fig. S18** The conductivity of aerogels with different SWNT contents

### 4.3. FESEM

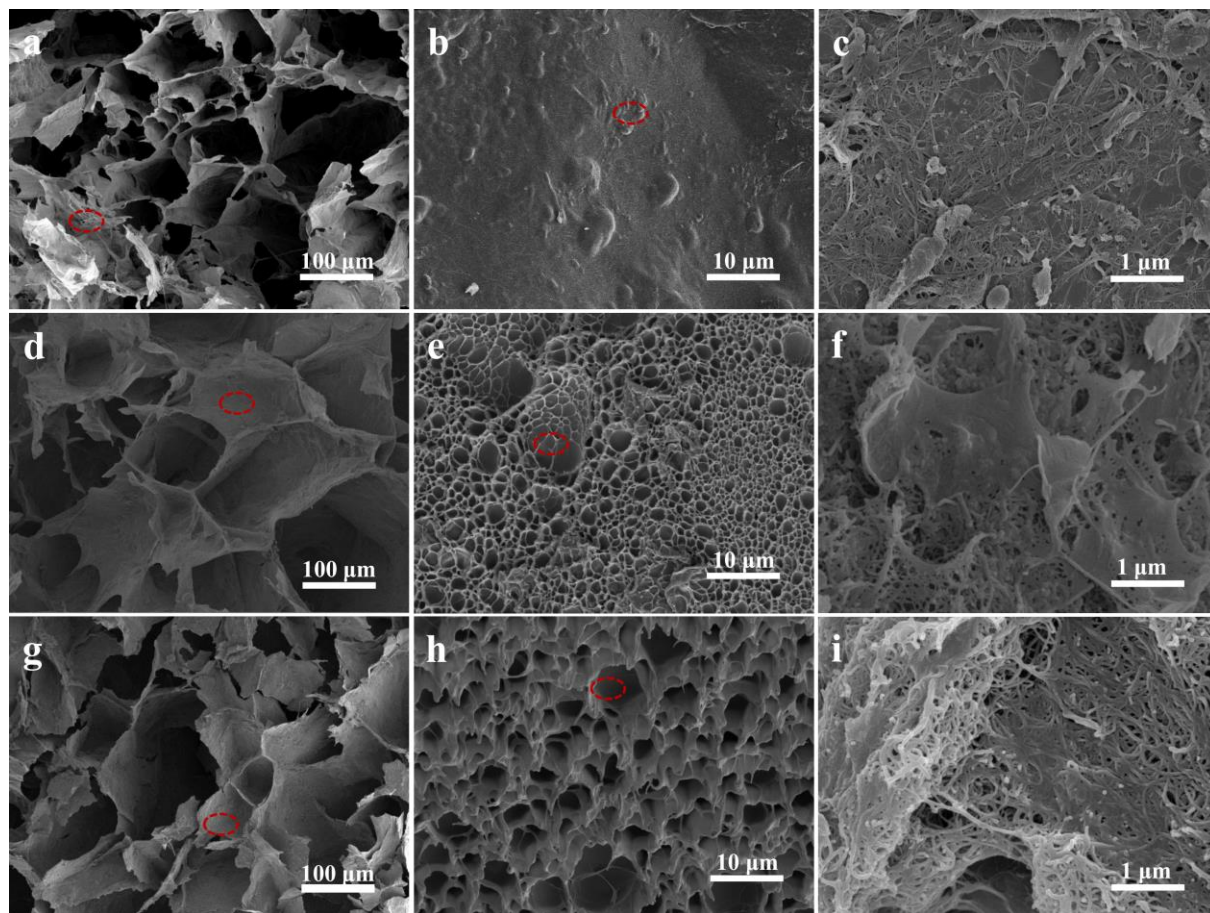

**Fig. S19** FESEM of NSC@CPP aerogels: (a-c) hygroscopic layer, (d-f) medial layer, (g-i) evaporative layer.

### 4.4. Density and pore size

From Table S3, the density of different layers was calculated by the drainage method. The density between different aerogel layers was close, about  $20 \text{ mg} \cdot \text{cm}^{-3}$ . In addition, BET studied the pore size of different regions of the aerogel. The aerogel includes macropores and micropores, and their diameters are about  $100\text{-}200 \text{ μm}$  and  $20\text{-}30 \text{ μm}$ . A continuous porous structure is found in the internal structure of the aerogel based on the test results of density and pore size, and determining the internal gradient structure is entirely dependent upon the surface characteristics of the material, which are independent of its density and pore size.

Table S3. Density and pore size of NSC@CPP aerogels

| Samples           | Density ( $\text{mg}\cdot\text{cm}^{-3}$ ) | Pore size ( $\mu\text{m}$ ) |             |
|-------------------|--------------------------------------------|-----------------------------|-------------|
|                   |                                            | large pores                 | tiny pores  |
| hygroscopic layer | $19.8 \pm 0.37$                            | $147 \pm 52$                | $24 \pm 16$ |
| medial layer      | $20.3 \pm 0.41$                            | $123 \pm 37$                | $22 \pm 13$ |
| evaporative layer | $20.1 \pm 0.49$                            | $155 \pm 46$                | $27 \pm 12$ |

## 4.5. Moisture-induced electricity performance

### 4.5.1. Content dependence

On one hand, increased SWNT content increases the probability of SWNTs contacting water molecules, the interaction between these molecules increases, and therefore, the output power of MEGs will be considerably increased. On the other hand, since the total weight of the composite airgel remains unchanged, as SWNT content increases, the amount of polymer matrix decreases, and the water absorption capacity of the airgel decreases accordingly (Fig. S20). SWNT content of 40 wt. % ultimately results in the best overall output of airgel as a result of competition between these two components (as is shown in Fig. S21-22).

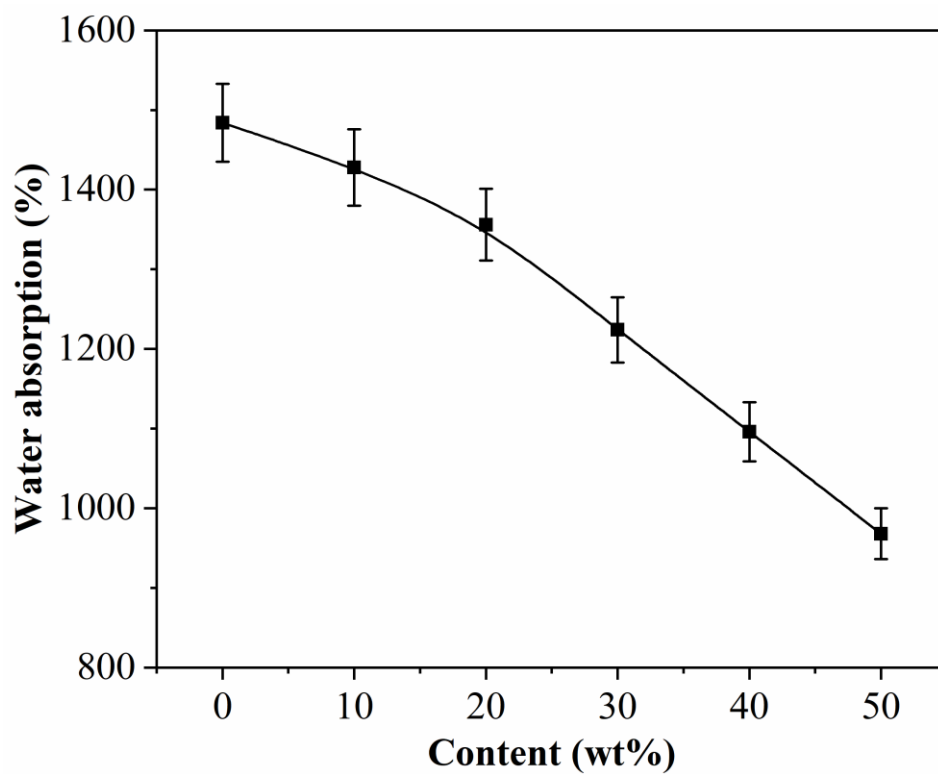

**Fig. S20** Water absorption of SWNT/PVA/CNF aerogels with different SWNT contents

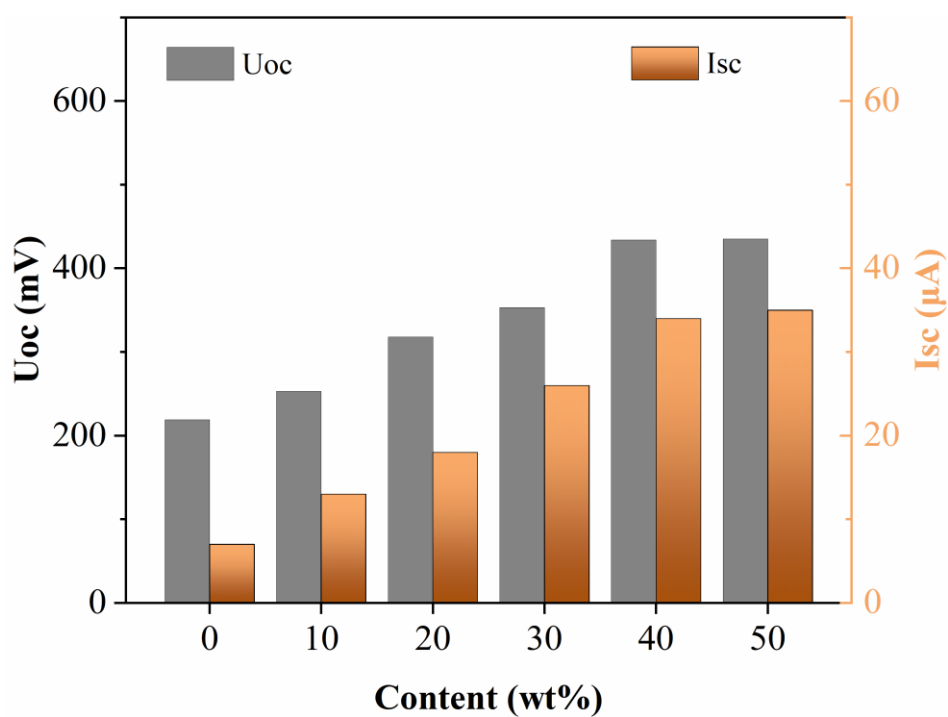

**Fig. S21**  $U_{oc}$  and  $I_{sc}$  of SWNT/PVA/CNF aerogels with different SWNT contents

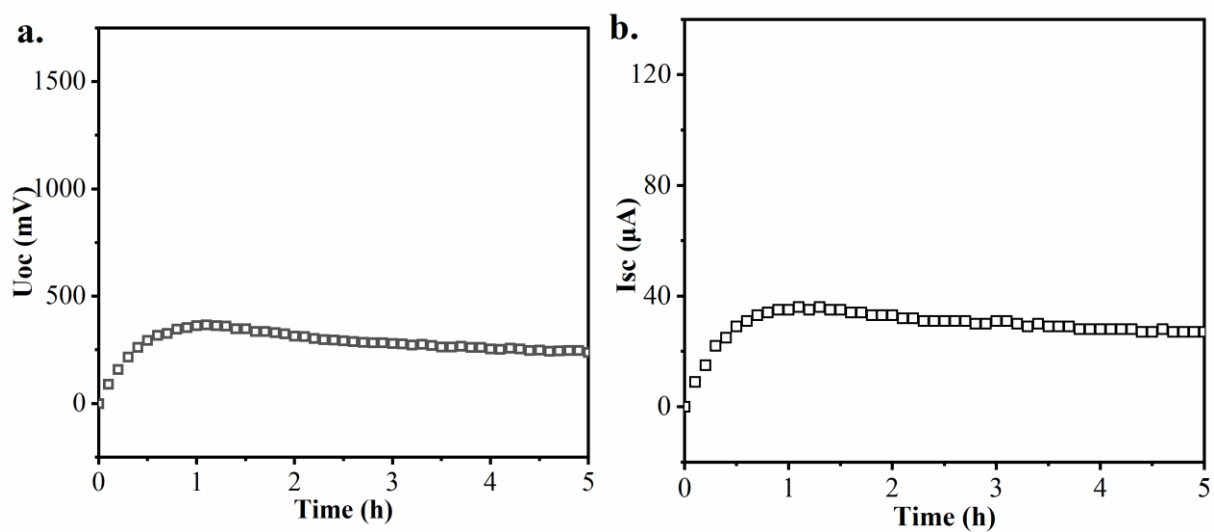

**Fig. S22** a.  $U_{oc}$ -time and b.  $I_{sc}$ -time curves of SWNT/PVA/CNF aerogels with 40 wt.% SWNT contents

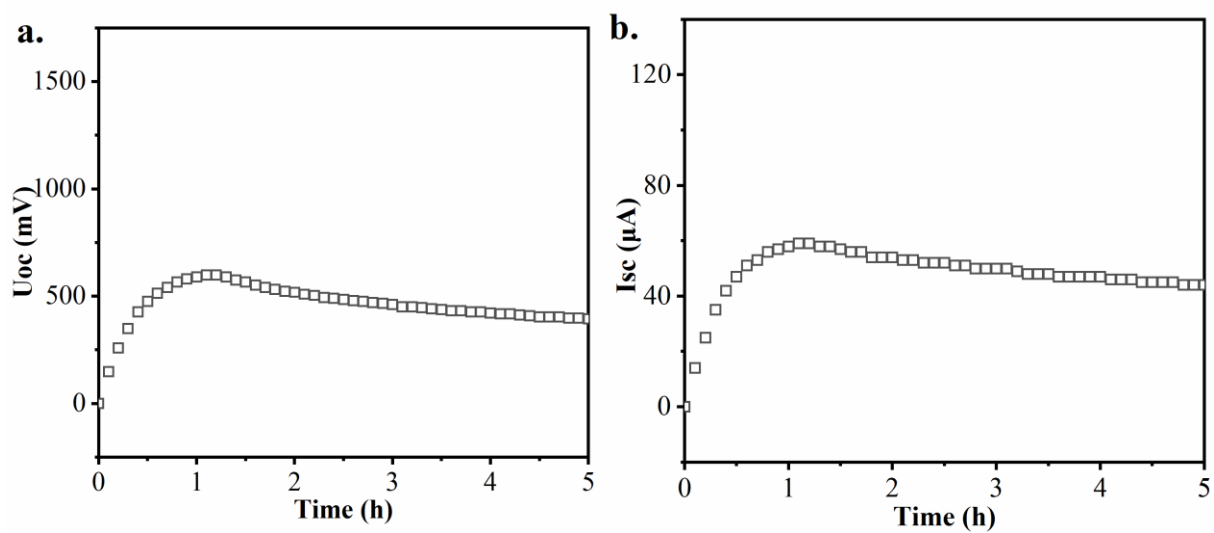

**Fig. S23** a.  $U_{oc}$ -time and b.  $I_{sc}$ -time curves of SWNT@PVA/CNF aerogels with 40 wt.% SWNT contents

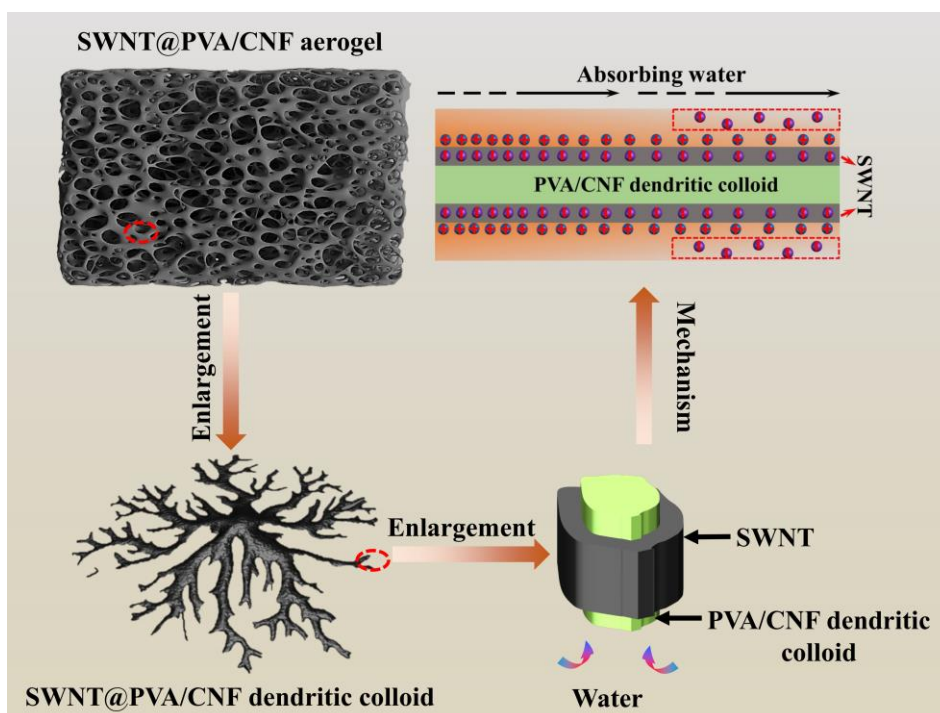

**Fig. S24** The working mechanism of moisture-electric energy conversion of SWNT@PVA/CNF aerogels

#### 4.5.2. Thickness dependence

Water flow rate is primarily responsible for Uoc of MEGs, and the greater the flow rate, the greater the Uoc. Initially, as thickness increased, the water absorption of aerogels grew, the weight of water flowing through per unit area grew, and the direct interaction between water and fillers grew. MEGs exhibit a linear increase in Uoc with increasing thickness in a similar manner to multiple commercial batteries connected in series (Fig. S25). Due to the effect of gravitational potential energy, as the thickness of MEGs increases, the transport of water from the bottom to the upper part of MEGs becomes more difficult, and the flow rate of water per unit area decreases, resulting in a gradual decrease in the Uoc of MEGs with an increase in thickness. In summary, when the thickness of the aerogel is 15 mm, the Uoc of MEGs is the highest.



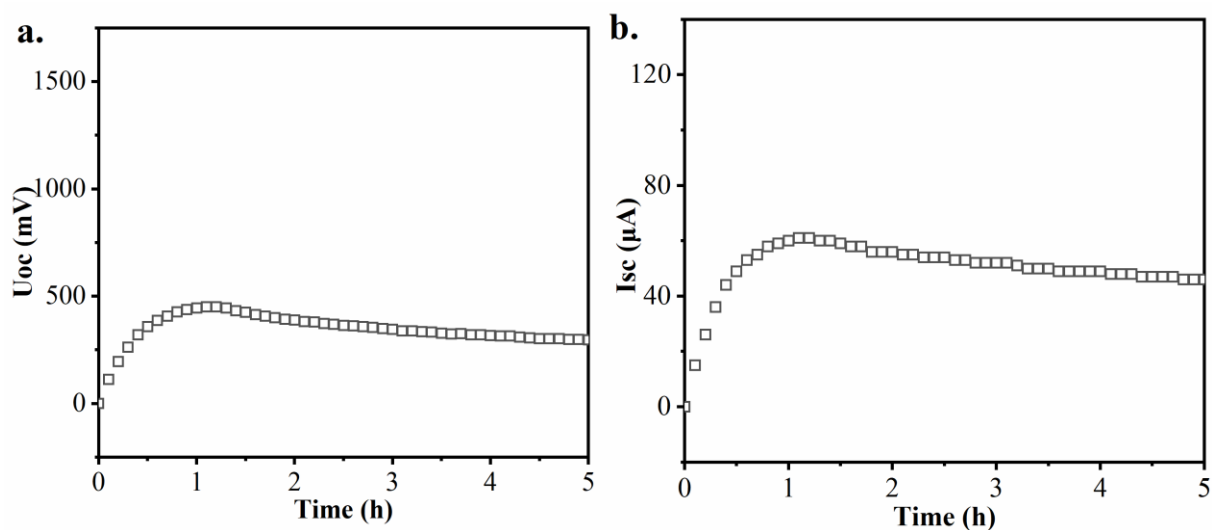

**Fig. S25** a. Uoc-time and b. Isc-time curves of SWNT@PVA/CNF aerogels with a thickness of 10 mm

### 4.5.3. Area dependence

In MEGs, the Isc is determined primarily by the flow rate of water per unit thickness. With an increase in radius, the area of the aerogel increases, the flow rate of water per unit thickness increases, and the interaction between the filler and water increases. When Uoc is almost constant, the Isc of MEGs increases in a similar way to parallel connection of multiple commercial batteries. Although the test results show that increasing the radius does help to increase the Isc of MEGs, the power density of MEGs does not continue to increase as the radius increases. From Table S4, when the radius of aerogel is 15 mm, the power density of MEGs is the highest ( $5.60 \mu\text{W}\cdot\text{cm}^{-2}$ ). Additionally, as the radius increases, the difficulty of aerogel preparation increases and the likelihood of collapse during freeze-drying increases. It was determined that the aerogel's radius was 15 millimeters based on the power density and the preparation of the aerogel.

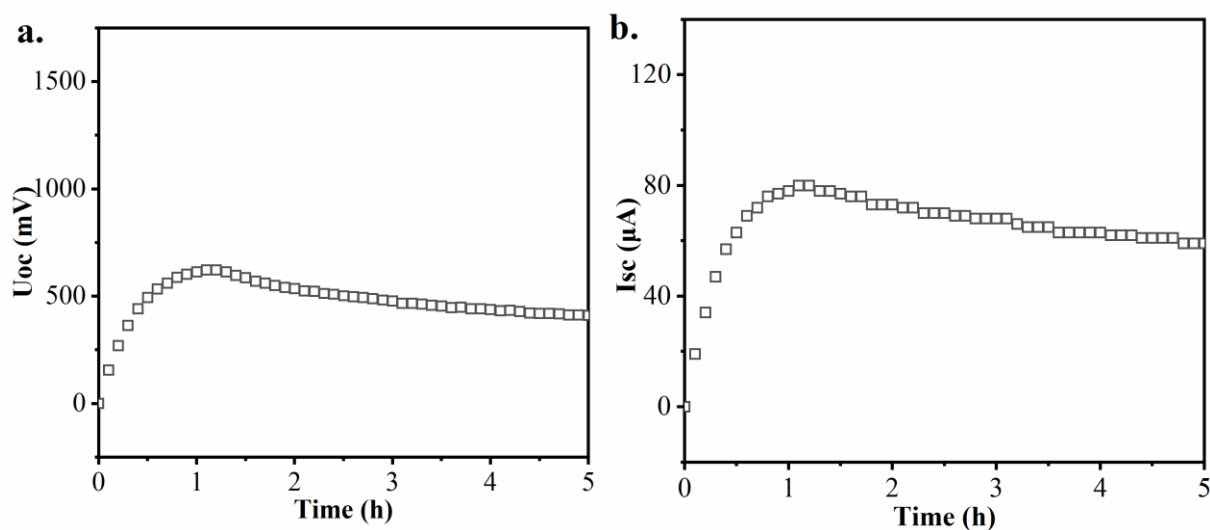

**Fig. S26** a. Uoc-time and b. Isc-time curves of SWNT@PVA/CNF aerogels with a radius of 20 mm

**Table S4.** The area and power density of SWNT@PVA/CNF aerogels with different radius

| Radius (mm) | Aera (cm <sup>2</sup> ) | Isc (μA) | Power Density (μW·cm <sup>-2</sup> ) |
|-------------|-------------------------|----------|--------------------------------------|
| 5           | 0.785                   | 5        | 3.29                                 |
| 10          | 3.14                    | 18       | 4.09                                 |
| 15          | 7.065                   | 61       | 5.60                                 |
| 20          | 12.56                   | 82       | 4.25                                 |

#### 4.5.4. Density dependence

In MEGs, a change in density has an adverse effect on the output performance due to the effect on the weight and water absorption of the filler. When the filler content remains unchanged, the weight of the filler inside the airgel increases as the density increases, and the probability of contact between water and the filler increases, thus improving the interface interaction. Meanwhile, with increasing density, the water absorption of aerogels decreases, which is detrimental to the performance of MEGs (Fig. S27). When the density of the aerogel is 20 mg·cm<sup>-3</sup>, the competition between the two leads to the best Uoc and Isc of MEGs (Fig. S28-29). In addition, from Fig. S30, density affects the airgel's moisture permeability by modifying the size of the pores. As density decreases, pore size increases, which hinders

capillary force in the microporous structure, and the water transport speed is slower (Fig. S31). The higher the density, the smaller the pore size of the aerogel, the stronger the van der Waals force between the water and the polymer matrix, and the slower the rate of water flow.

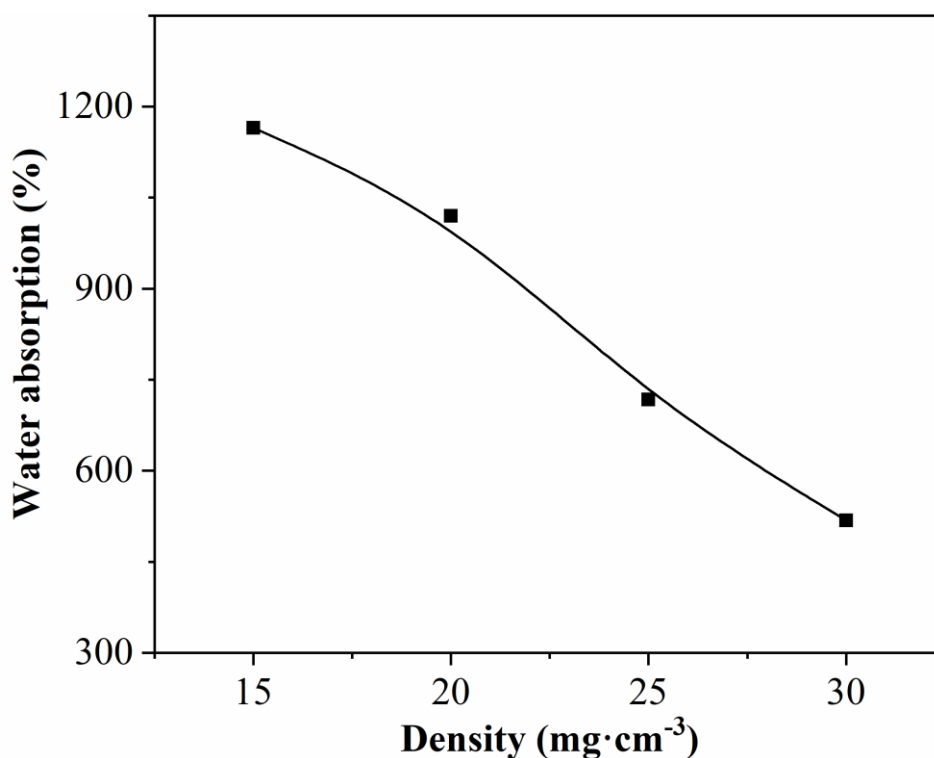

**Fig. S27** Water absorption of SWNT@PVA/CNF aerogels with different density

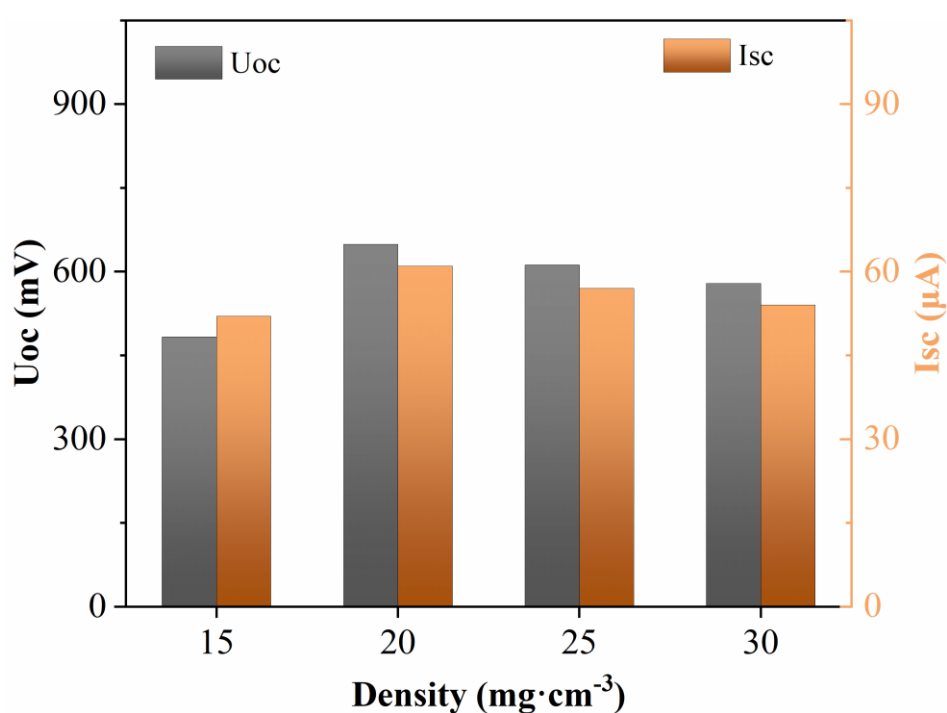

**Fig. S28** Uoc and Isc of SWNT@PVA/CNF aerogels with different density

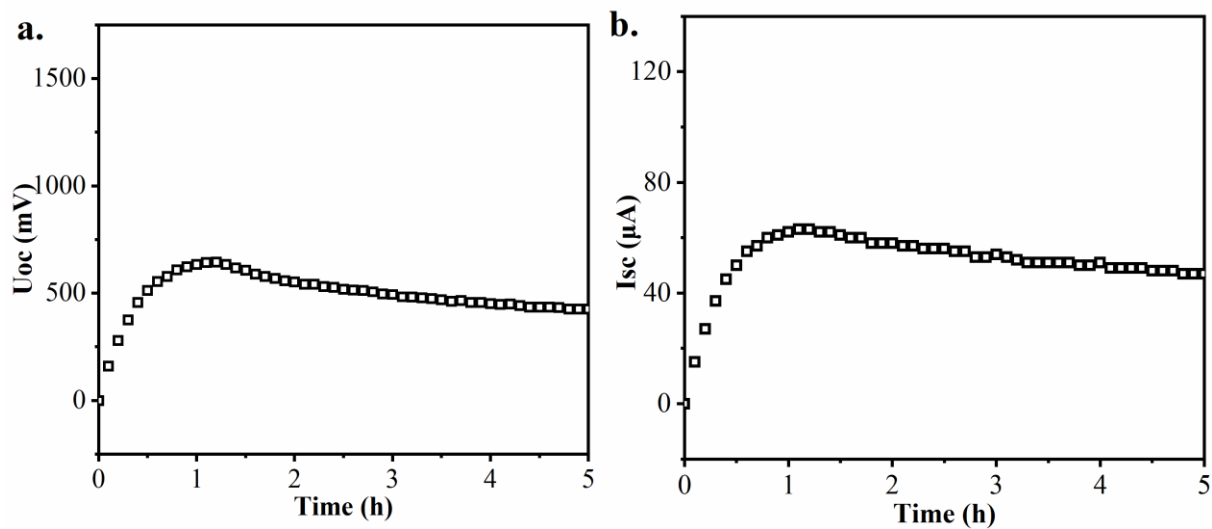

**Fig. S29** a. Uoc-time and b. Isc-time curves of SWNT@PVA/CNF aerogels with a density of  $20 \text{ mg}\cdot\text{cm}^{-3}$

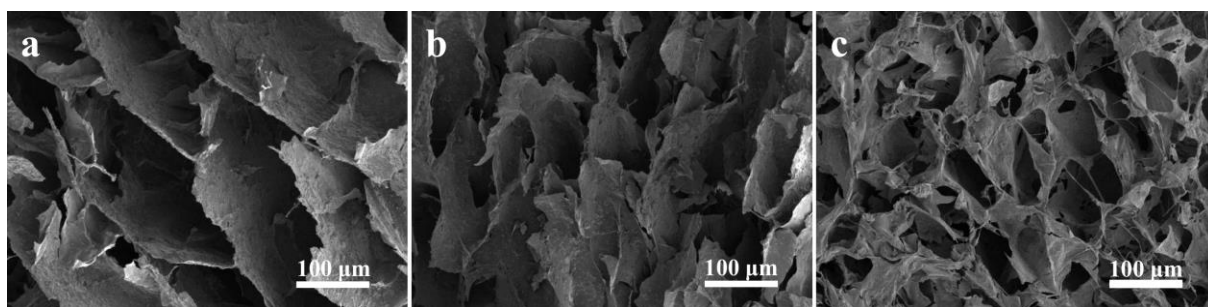

**Fig. 30** FESEM of SWNT@PVA/CNF aerogels with different densities: a. 15, b. 20 and, c. 30  $\text{mg}\cdot\text{cm}^{-3}$

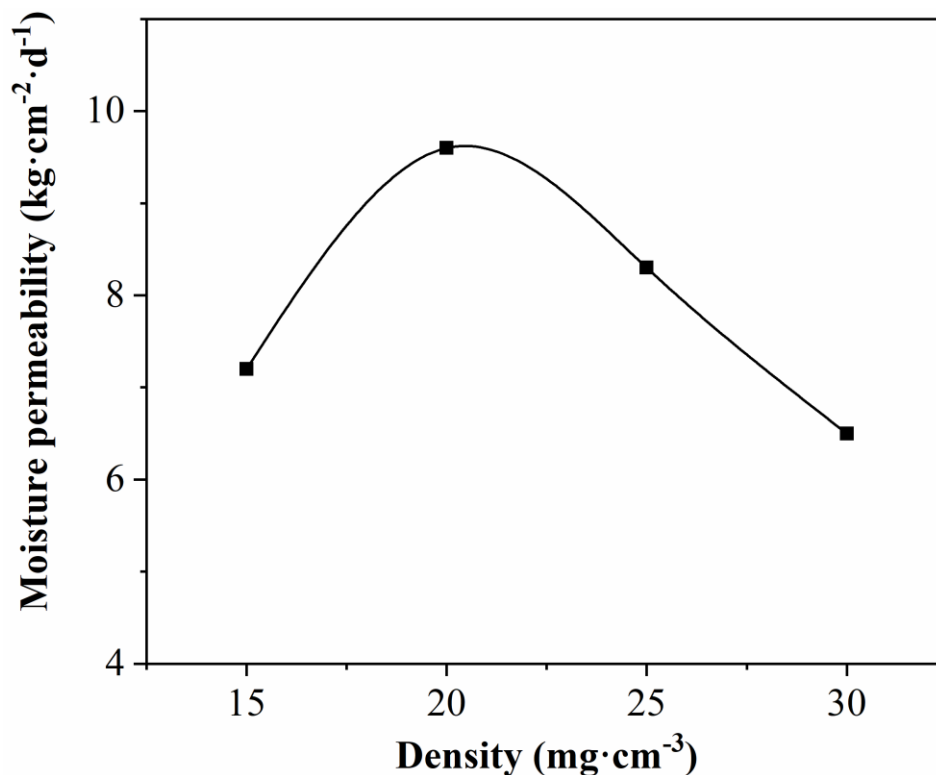

**Fig. S31** Moisture permeability of SWNT@PVA/CNF aerogels with different density

#### 4.5.5. Comparison of literatures

**Table S5** Comparison of MEGs in this work with literature

| Ref  | Active material     | Matrix | Structure | Methodology     | Ion gradient | Hydrophilicity gradient | Power density ( $\mu\text{Wh}\cdot\text{cm}^{-2}$ ) | Energy density ( $\mu\text{Wh}\cdot\text{cm}^{-2}$ ) |
|------|---------------------|--------|-----------|-----------------|--------------|-------------------------|-----------------------------------------------------|------------------------------------------------------|
| [9]  | GO                  | PVA    | Aerogel   | Freeze drying   | √            | ×                       | 23.5                                                | 7.73                                                 |
| [16] | GO                  | PVA    | Aerogel   | Freeze drying   | √            | ×                       | 18.75                                               | 42.36                                                |
| [39] | PEDOT: PSS          | PSSA   | Hydrogel  | Cross-linking   | √            | ×                       | 26.55                                               | 81.79                                                |
| [40] | CB                  | PVA    | Hydrogel  | Cross-linking   | ×            | √                       | 15.03                                               | 45.08                                                |
| [41] | Phytic acid         | PVA    | Hydrogel  | Crosslinking    | √            | ×                       | 10.69                                               | 15.73                                                |
| [42] | MOF/GO              | ILs    | Film      | Cast forming    | √            | ×                       | 12                                                  | 2.00                                                 |
| [43] | Protein nanofibrils |        | Film      | Coating         | ×            | √                       | 9.29                                                | 7.55                                                 |
| [44] | Cellulose/SDBS      |        | Fabric    | Electrospinning | √            | ×                       | 11.5                                                | 24.22                                                |
| [45] | GO                  | PU     | Foam      | Coating         | √            | ×                       | 19.87                                               | 24.64                                                |

|                  |       |            |         |               |   |   |              |               |
|------------------|-------|------------|---------|---------------|---|---|--------------|---------------|
| [46]             | CNTs  | Cellulose  | Paper   | Coating       | × | √ | 14           | 3.37          |
| <b>This Work</b> | SWNTs | PVA/CNF/CS | Aerogel | Freeze drying | √ | √ | <b>32.59</b> | <b>165.23</b> |

#### 4.5.6. Cycling stability

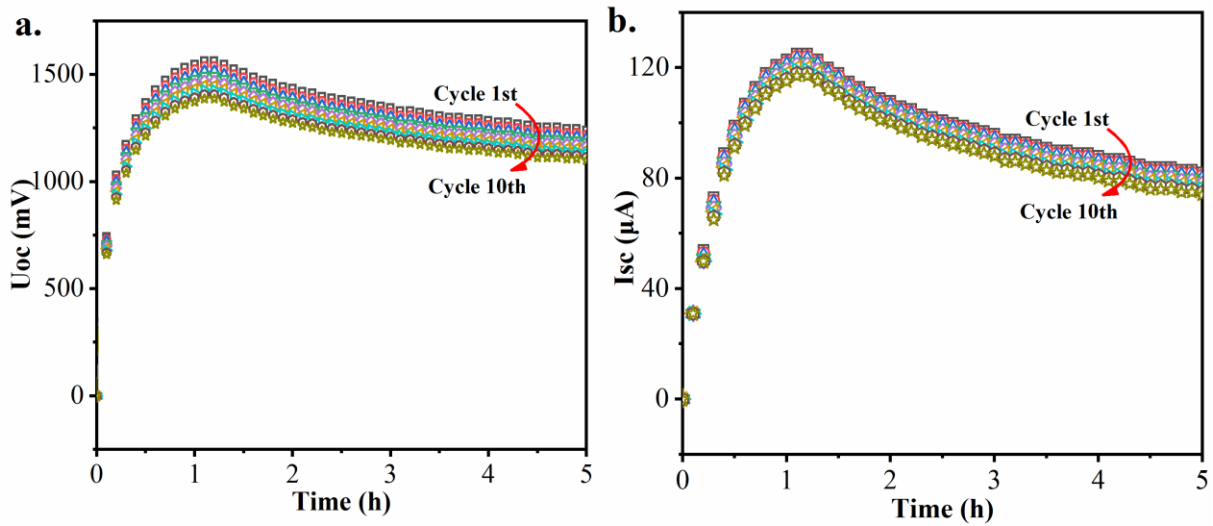

**Fig. S32** a. Uoc and b. Isc of NSC@CCP aerogels with different cycles.

#### 4.5.7. Electrode dependence

A porous nickel electrode and a porous silver electrode were selected as electrodes for further study of MEG performance, as shown in Fig. S33<sup>S1</sup>. Whenever the work function of a metal is less than the work function of a carbon nanotube, the conduction band of the metal contacts the carbon nanotube, and electrons serve as the carriers. In contrast, the valence band of a metal is in contact with a carbon nanotube if its work function exceeds that of a carbon nanotube, and the carrier is a hole in the valence band is greater. It is found that the work functions of Ag and Ni electrodes are 4.26 and 4.6 eV, respectively, which are lower than those of SWNT (4.83 eV). Consequently, both Ag/SWNT and Ni/SWNT exhibit Schottky diode characteristics, in which electrons flow from metal electrodes to SWNTs. There are opposite Schottky junctions on two Ag or Ni electrodes, which severely weaken the charge diffusion (Fig. S33a-b and d). Generally, as is shown in Fig. S34-35, MEGs operate at about 1.5 V and

130  $\mu\text{A}$  when Ag or Ni is used as the electrode (including Ag-Ag, Ni-Ni, Ag-Ni). Pt electrodes show a higher work function than SWNT electrodes, indicating an ohmic contact (Fig. S33c). From Fig. S34-35, due to a lack of Schottky junction between the two Pt electrodes, electrons flow from the semiconductor to the metal, resulting in the recombination of positive and negative charges and the reduction of  $U_{oc}$  ( $\approx 1.37$  V) and  $I_{sc}$  ( $\approx 112$   $\mu\text{A}$ ). As is shown in Fig. S4-35, MEGs with Ag-Pt or Ni-Pt alternating electrodes have  $U_{oc}$  and  $I_{sc}$  values close to 1.73 V and 127  $\mu\text{A}$ , respectively. Ag/SWNT or Ni/SWNT interfaces form a space charge region that prevents negatively charged electrons from flowing into the SWNT layer, thereby promoting charge separation in the entire SWNT (Fig. S33e-f).

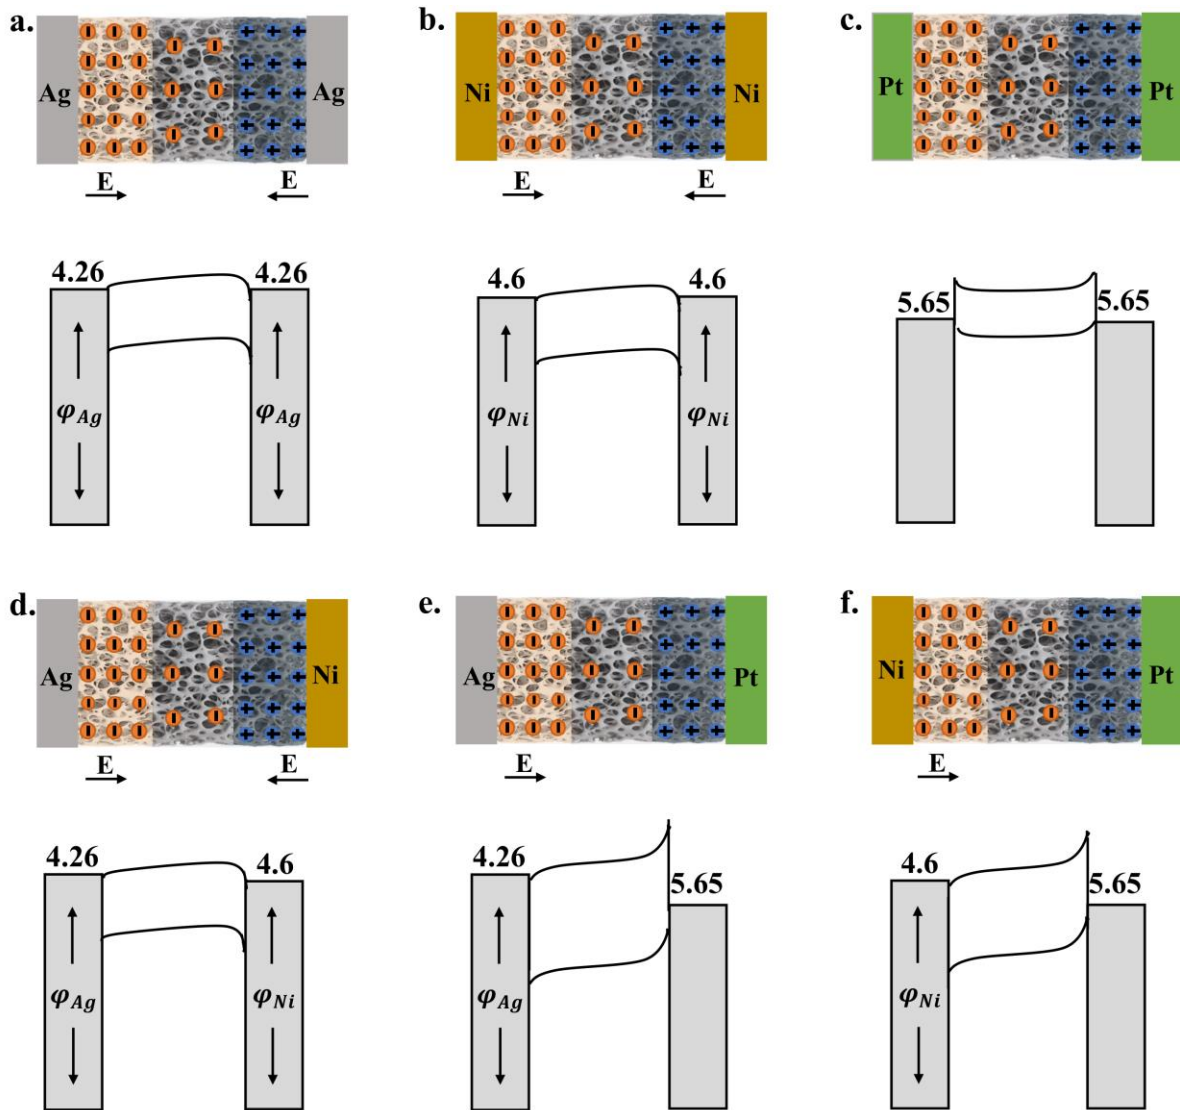

**Fig. S33** Comparison of MEGs with different configurations. a-f Device structure (top) and energy band

diagram (bottom)

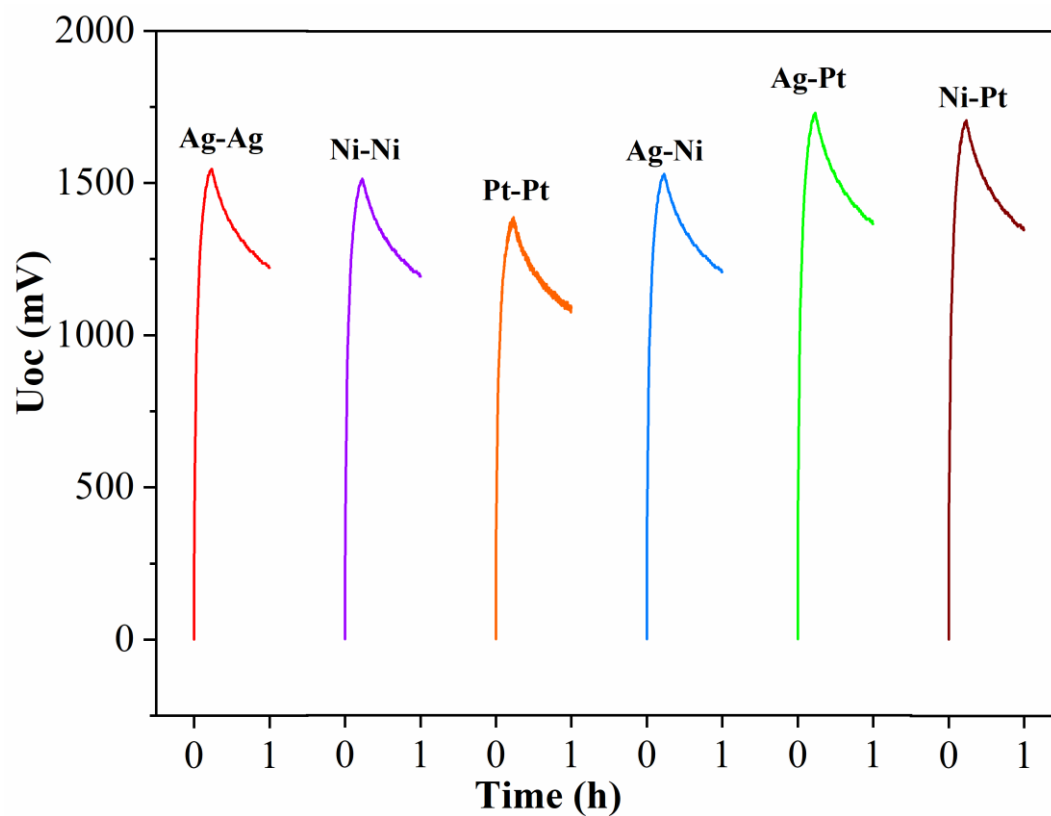

**Fig. S34**  $U_{oc}$ -time curves of the above three MEGs with different device configuration



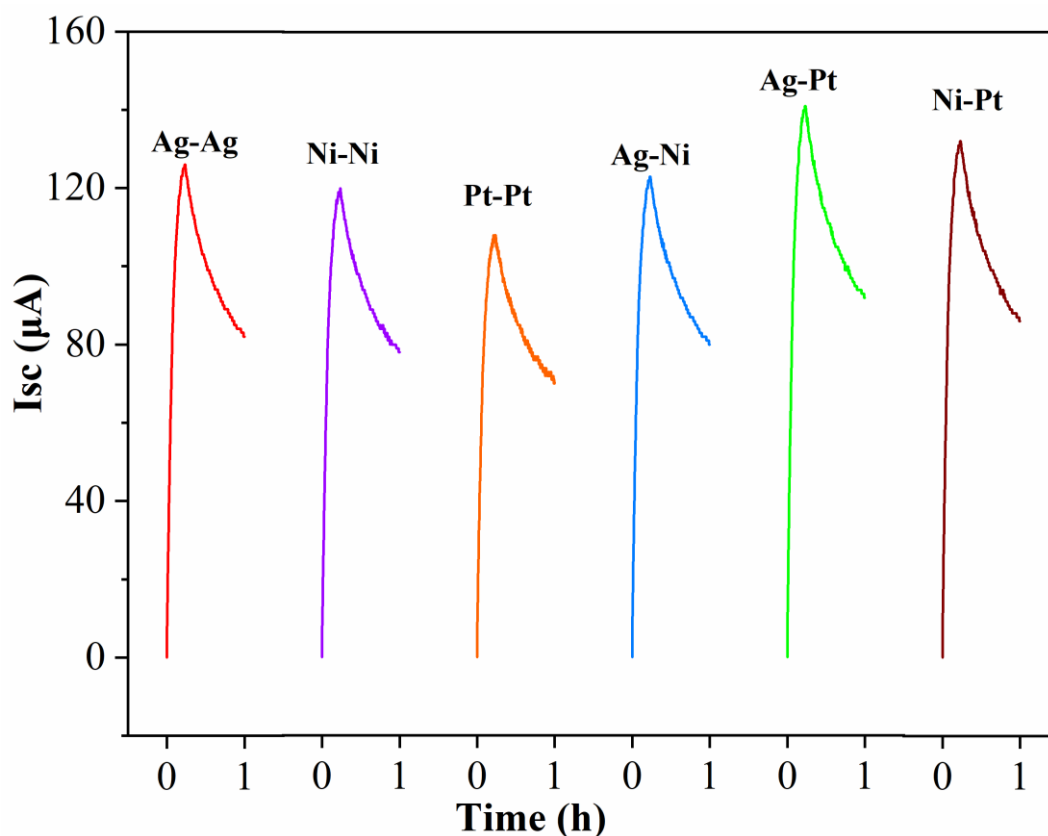

Fig. S35 Isc-time curves of the above three MEGs with different device configuration

#### 4.5.8. Density Functional Theory (DFT) calculations

The binding energy and charge transfer of SWCNTs, CSWNT, and NSWNT and water molecule are studied by the DFT-based Vienna ab initio simulation package (VASP). Exchange-correlation energy is described by general gradient approximation with the projector augmented wave method and Perdew–Burke–Ernzerhof functional<sup>S2,3</sup>. The projected-augmented wave (PAW) method was used to describe the electron–ion interactions, and for valence electrons, a plane-wave basis set was employed. The generalized gradient approximation method is known as GGA-PBE was used for the exchange–correlation function. A cut-off energy of 500 eV was imposed for the plane-wave basis set, and G-point sampling was used for the Brillouin zone integration. To nullify the interactions between periodic images along the axis perpendicular to the surface, all slabs were separated by 20 Å along this direction perpendicular. The initial structures were generated by Materials Studio, and the initial geometries were further relaxed

via DFT simulations. The kinetic energy cutoff is set at 600 eV and the energy and force convergence was set at  $10^{-8}$  eV and  $10^{-3}$  eV/Å. The projector augmented wave potentials are used with a kinetic energy cutoff of 500 eV—a  $5 \times 5$  k mesh sampled Brillouin zone integration (Fig. S36-41). The system is simulated with a periodic boundary condition by placing one or four water molecules on the surface of a  $4 \times 14$  supercell of the SWNT, spaced by 20 Å along the average direction. CSWNT and NSWNT are constructed by GaussView 6.0. Dipole correction is considered to exclude the artificial dipole-dipole interaction between adjacent images. The geometry is fully relaxed without any constraint by using the conjugate gradient method until the force on each atom was less than  $0.01$  eV·Å $^{-1}$ . The adsorption energy for hydrated ions adsorbed on graphene was calculated using  $E_a = E_g + E_{hi} - E_{system}$ , where  $E_g$ ,  $E_{hi}$  and  $E_{system}$  are the energies of SWNT, a hydrated ion and the combined system, respectively.

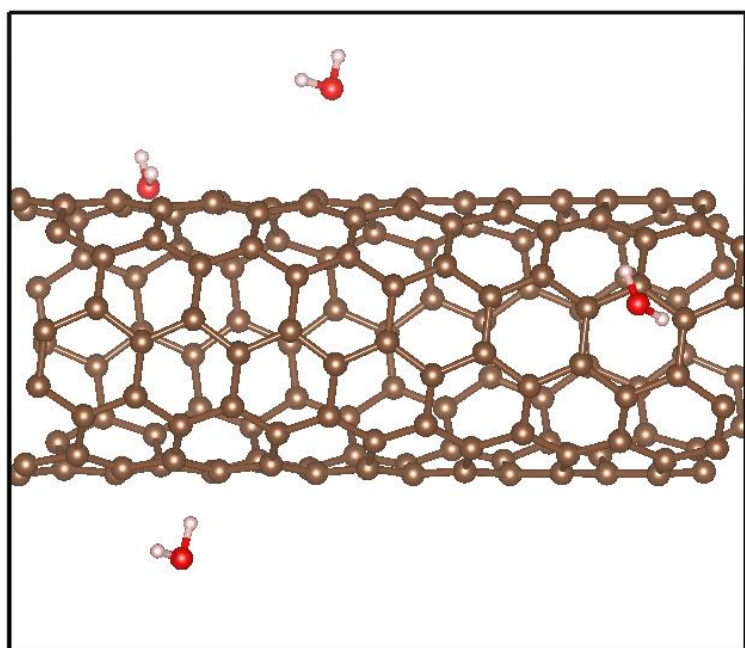

**Fig. S36** Models for DFT calculation of four water molecules adsorbed on SWNT

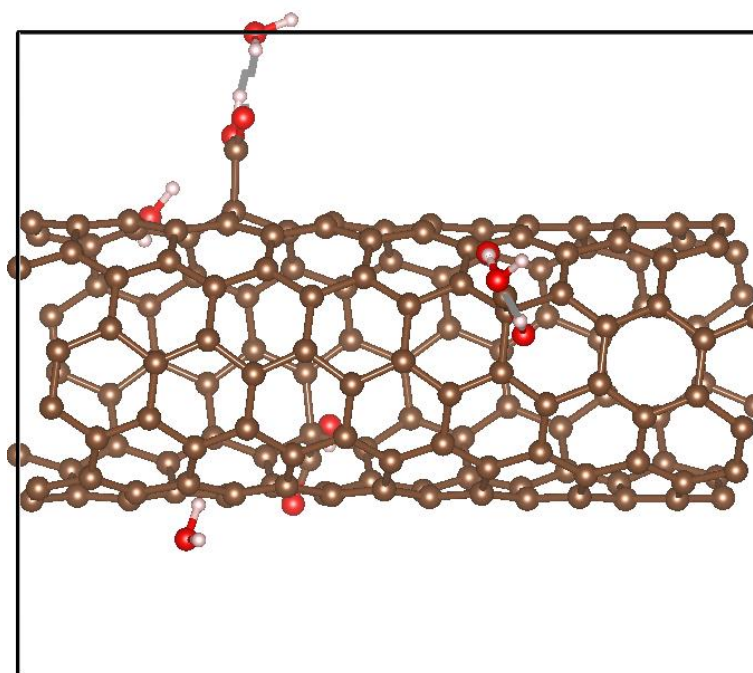

**Fig. S37** Models for DFT calculation of four water molecules adsorbed on CSWNT

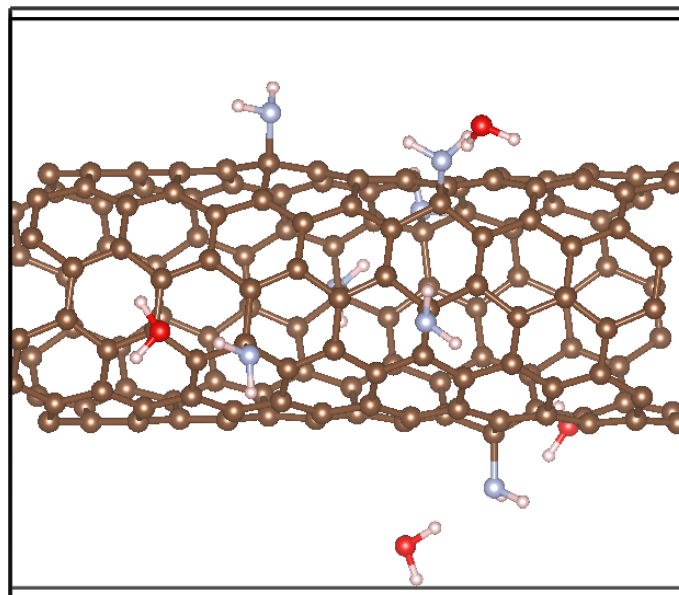

**Fig. S38** Models for DFT calculation of four water molecules adsorbed on NSWNT

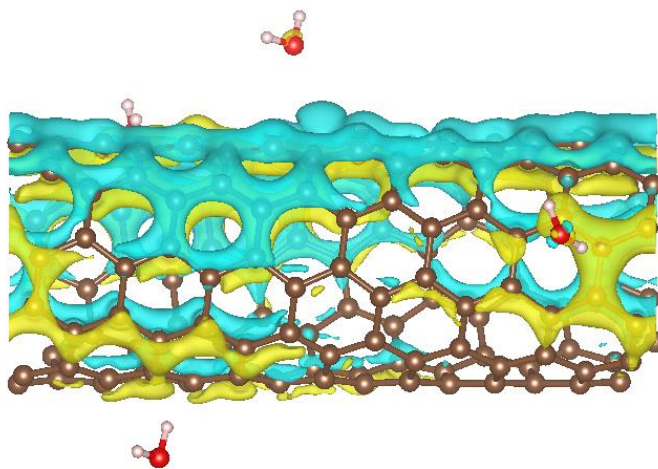

**Fig. S39** Charge redistribution of SWNT upon adsorption of four water molecules

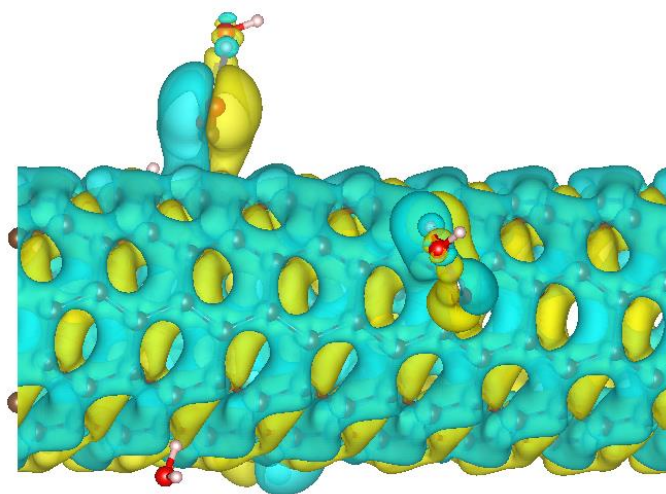

**Fig. S40** Charge redistribution of CSWNT upon adsorption of four water molecules

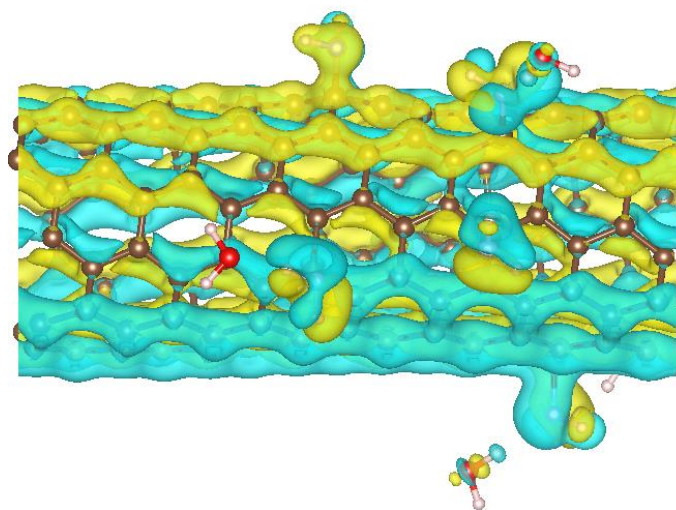

**Fig. S41** Charge redistribution of NSWNT upon adsorption of four water molecules

#### **4.5.9. KPFM**

A scanning KPFM system (SKP5050, KP technology) was used to characterize the surface potentials of the hygroscopic, medial and evaporation layers before and after moisturizing. A highly oriented pyrolytic graphite reference sample (ScanSens GmbH) was used to calibrate the system.



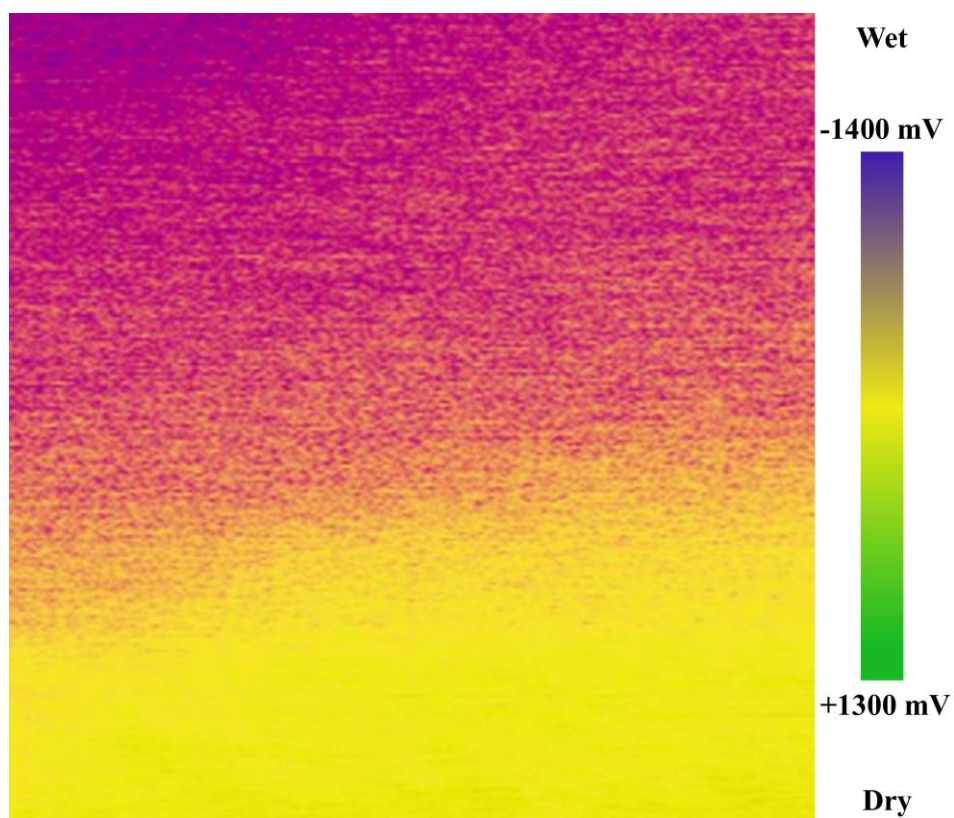

**Fig. S42** Relative surface potentials of the medial layer of NSC@CCP aerogel under dry and wet

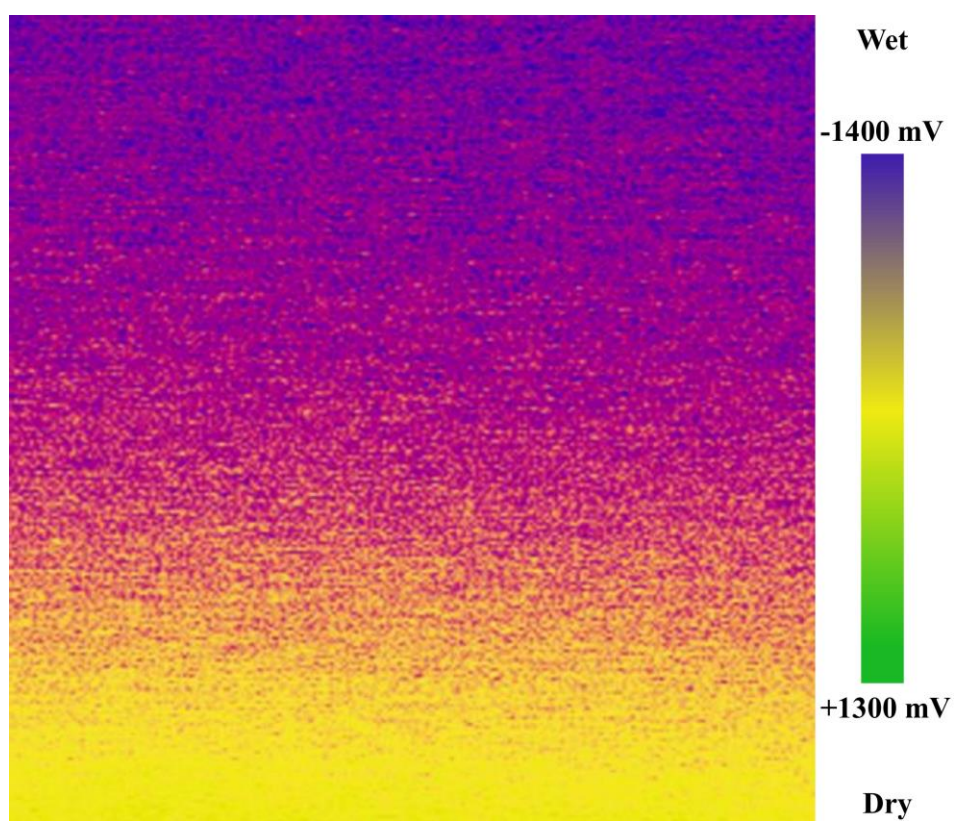

**Fig. S43** Relative surface potentials of the hygroscopic layer of NSC@CCP aerogel under dry and wet

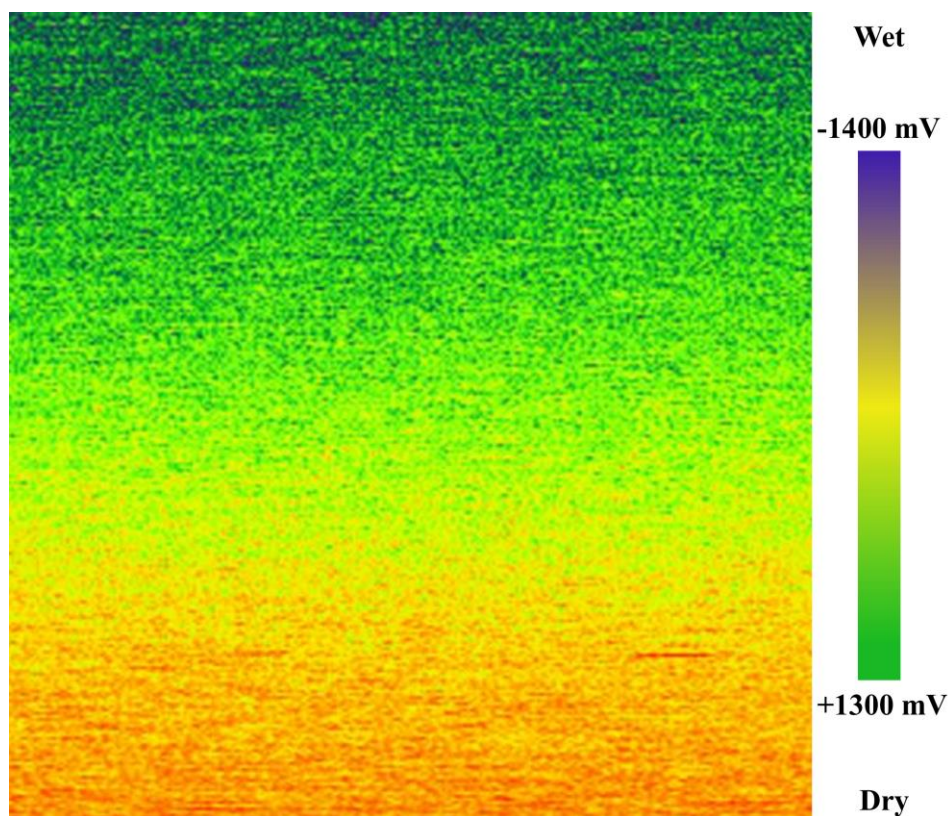

**Fig. S44** Relative surface potentials of the evaporation layer of NSC@CCP aerogel under dry and wet

#### 4.5.10. Ion density gradient dependence

The zeta potentials of the hygroscopic, medial and evaporative layers were measured using a solid surface Zeta potential tester (SurPASS 3, Austria) by flow potential method at pH = 7.

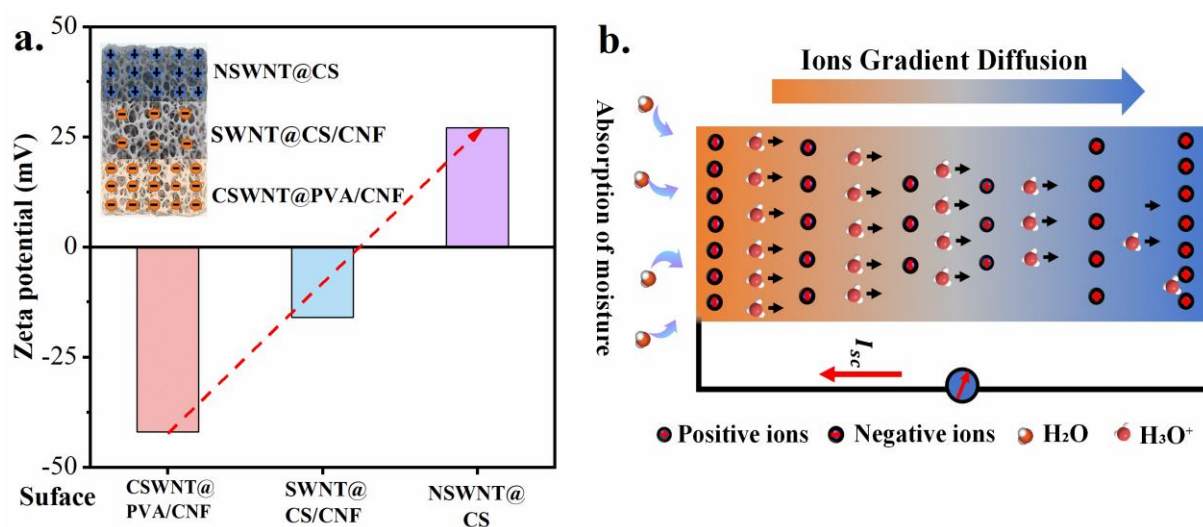

**Fig.S45** a. Zeta potential of the hygroscopic, medial and evaporative layer; b. Schematic illustration of the

#### 4.5.11. Hydrophilicity gradient dependence

##### 4.5.11.1. Mass change

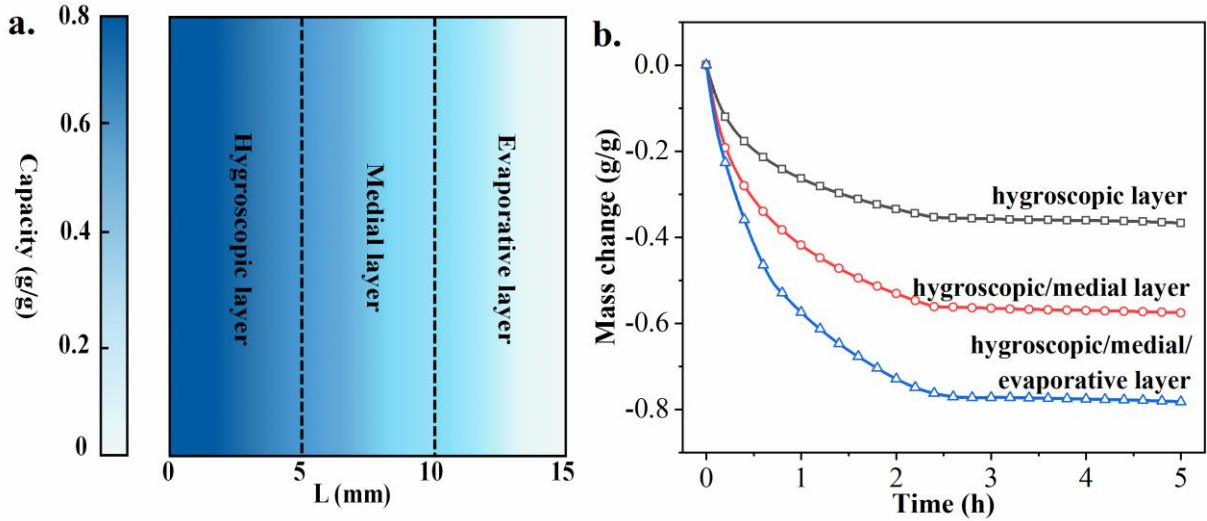

**Fig. S46** a. Water content map of the MEGs after moisture adsorption in 60% RH for over 24 h. The water content map was depicted by gravimetrically analyzing water absorbed by each layer. b Mass change in the hygroscopic layer, hygroscopic layer/medial layer and hygroscopic layer/medial/evaporative layer versus time under one-sun illumination.

##### 4.5.11.2. COMSOL simulations

Numerical simulations of water transport in aerogel were conducted by COMSOL Multiphysics 5.3. The geometry was established under the same size and similar shape as the aerogel. The mass transfer process in the aerogel includes two-phase flows, liquid phase transport, and vapor phase transport<sup>S4</sup>. For two-phase flows, the aerogel can be considered as a porous solid matrix, where the saturation variables of moist air ( $S_g$ ) and water ( $S_l$ ) flow in the porous gel fulfill the following Equation S1,

$$S_g + S_l = 1 \quad \text{Eq. S1}$$

The Brinkman Equation S2 was used to calculate the flow field  $u_g$  and pressure



distribution  $p_g$  of moist air in the porous medium,

$$-\nabla p_g + \nabla \frac{\mu}{\varepsilon} (\nabla u_g + \nabla u_g^T) - \frac{\mu}{\kappa} u_g = 0 \quad \text{Eq. S2}$$

where  $p_g$  is the pressure of moisture air,  $u_g$  is Darcy's velocity field,  $\mu$  is the dynamic viscosity of the fluid,  $\varepsilon$  is the porosity, and  $\kappa$  is the permeability of the medium.

The liquid water transport velocity of porous aerogel is simulated by solving the combination of Darcy's Law and capillary effect,

$$u_l = -\frac{\kappa_l}{\mu_l} \nabla p_l \quad \text{Eq. S3}$$

Where  $\kappa_l$ ,  $\mu_l$  and  $\nabla p_l$  are the permeability, viscosity, and pressure gradient of the liquid phase within the aerogel, respectively. The mass transport of the liquid phase inside the porous domain can be written as follows:

$$R = -\frac{\partial c}{\partial t} \nabla \cdot J \quad \text{Eq. S4}$$

where  $J$  represents the diffusion flux of water, and  $R$  represents the mass of the evaporation.

The water vapor transfer velocity could be defined as:<sup>S5</sup>

$$u = \frac{u_g}{S_g \varepsilon} - \frac{\rho_g}{M_g^2} D_{eff} \nabla \left( \frac{M_g}{\rho_g} \right) \quad \text{Eq. S5}$$

where  $M_g$  and  $\rho_g$  refer to the mass and density of the moist air, respectively,  $M_a$  is the mass of air,  $D_{eff}$  is the effective diffusivity for two components and is defined by Millington and Quirk equation:

$$D_{eff} = D_{va} \varepsilon^{4/3} S_g^{10/3} \quad \text{Eq. S6}$$

where the  $D_{eff}$  is the vapor-air diffusivity with the value of  $2.6 \times 10^{-5} \text{ m}^2 \text{ s}^{-1}$ .

Considering the water confinement of the polymeric network and the convection of the air, the heat transfer near the surface could be described by the equation given below:

$$E = \rho C_{p,tot} \frac{\partial T}{\partial t} + \rho C_{p,tot} u \cdot \nabla T + \nabla [\kappa_{tot} \nabla T] \quad \text{Eq. S7}$$

where  $E$  represents the thermal energy input from the optical-thermal conversion.  $\rho$ ,  $C_{p,tot}$  and  $\kappa_{tot}$  are the total density, heat capacity, and thermal conductivity of moist air and liquid phase, respectively.

The latent heat source within the aerogel is set to be  $Q_{evap}$ ,

$$Q_{evap} = -H_{evap} \cdot m_{evap} \quad \text{Eq. S8}$$

where  $H_{evap}$  is the latent heat of evaporation, and  $m_{evap}$  is the evaporation flux at the aerogel top surface.

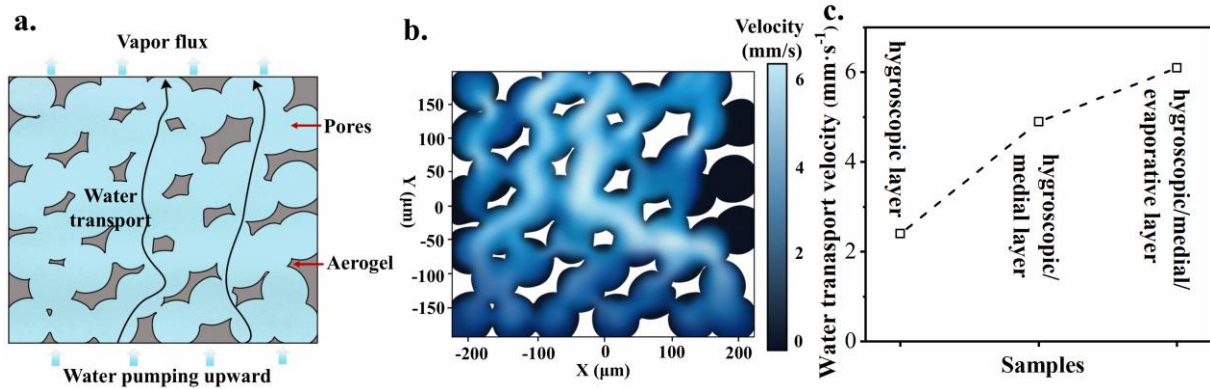

**Fig. S47** a. Schematic of the COMSOL model of aerogel, b. Simulated water transport velocity mapping and low-tortuosity water pathways in aerogel, c. Calculated water transport velocity of aerogel via COMSOL.

#### 4.5.12. Energy conversion efficiency.

##### 4.5.12.1. Calculation of input energy.

Since there is no extra energy in the MEET system, Gibbs free energy ( $\Delta G$ ) is the sole energy source in the energy conversion process and defines the maximum power output.

$$\Delta G = u_1 - \mu_2 \approx RT \ln \frac{C_0}{C_0 - \Delta C} \quad \text{Eq. S9}$$

where  $R$ ,  $T$  and  $C_0$  are ideal gas constant, Kelvin temperature, and relative humidity of the inserted water end in MEGs<sup>S6-8</sup>. Since the air humidity is tested as 40 % and the  $\Delta C$  is assumed to be 60%,  $C_0$  should be 100 %. As a result, we get  $\Delta G \approx -2.20 \text{ KJ} \cdot \text{mol}^{-1}$  at 293 K. Based on the weight change of foam before, and after absorbing water, the weight of absorbed water ( $\approx 4.10 \text{ g}$ ) is obtained. The calculated energy input of one cycle of MEGs is  $70.79 \text{ } \mu\text{W} \cdot \text{cm}^{-2}$ .

#### 4.5.12.2. Calculation of internal energy conversion efficiency.

The power output ( $W_{MEGs}$ ) of MEGs can be calculated as:  $W_{MEGs} = \int I_{sc}(t) \cdot U_{oc}(t) dt$  where  $I_{sc}$ ,  $U_{oc}(t)$  and  $t$  is the short-circuit current density, open-circuit voltage, and cycle time. The calculation results showed ca.  $32.59 \mu W \cdot cm^{-2}$ , and the CPE harvesting efficiency is ca. 46.04%

### 5. Application

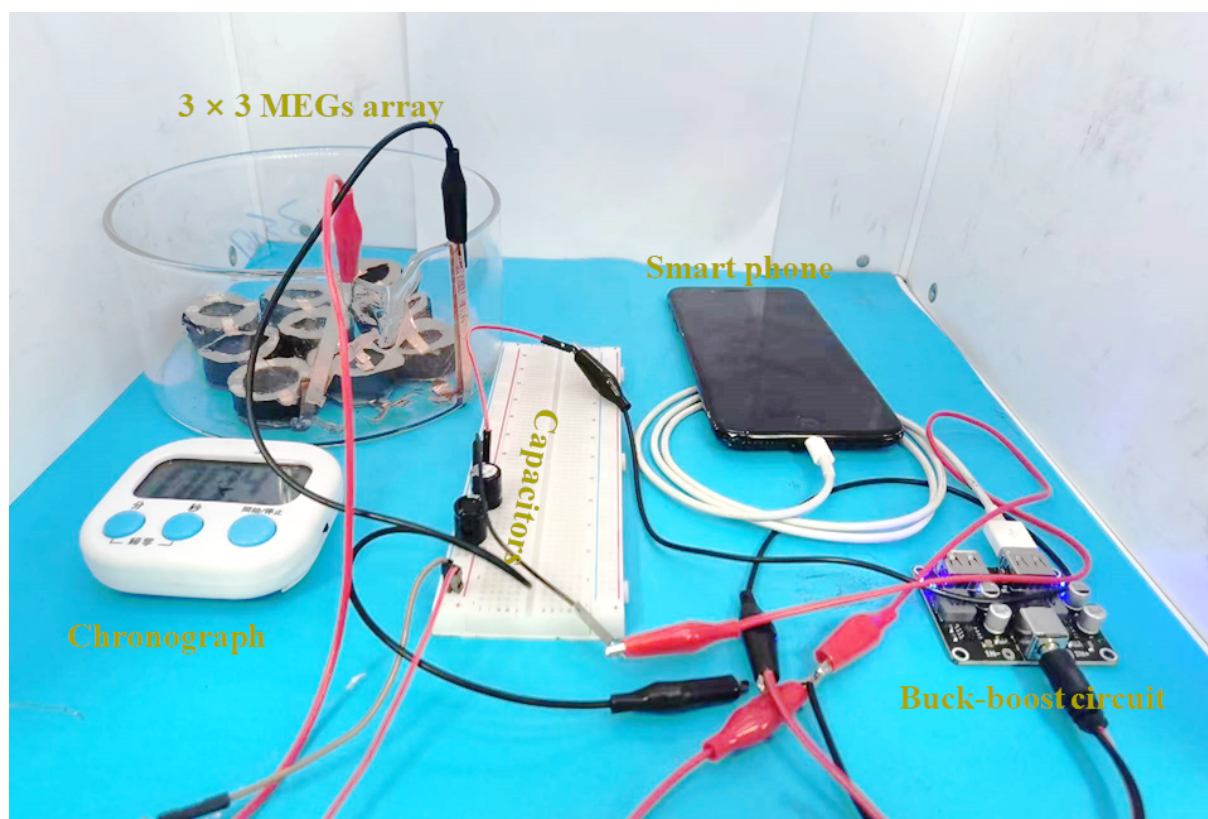

**Fig. S48** Photograph of a working MEGs in combination with the power-management circuit to charge a smart phone.

### 6. Supporting References

- S1 Y. Huang, H. Cheng, C. Yang, P. Zhang, Q. Liao, H. Yao, G. Shi and L. Qu, Nat. Commun., 2018, 9, 4166.

- S2 C. Liu, S. Wang, X. Wang, J. Mao, Y. Chen, N. X. Fang and S. P. Feng, *Energy Environ. Sci.*, 2022, 15, 2489–2498.
- S3 J. Bae, T. G. Yun, B. L. Suh, J. Kim and I. D. Kim, *Energy Environ. Sci.*, 2020, 13, 527–534.
- S4 A. K. Datta, *J. Food Eng.*, 2007, 80, 80–95.
- S5 Y. Guo, L. S. Vasconcelos, N. Manohar, J. Geng, K. P. Johnston and G. Yu, *Angew. Chemie*, , DOI:10.1002/ange.202114074.
- S6 Y. Zhang, T. Xiong, D. K. Nandakumar and S. C. Tan, *Adv. Sci.*, , DOI:10.1002/advs.201903478.
- S7 Y. Zhang, H. Zhang, T. Xiong, H. Qu, J. J. Koh, D. K. Nandakumar, J. Wang and S. C. Tan, *Energy Environ. Sci.*, 2020, 13, 4891–4902.
- S8 J. Mao, J. Icozzia, J. Huang, K. Meng, Y. Lai and Z. Lin, *Energy Environ. Sci.*, 2018, 11, 772–799.
